# Supplementary material for: ClinPrior: an algorithm for diagnosis and novel gene discovery by network-based prioritization
Source: PubMed Central journal article supplement (PMC10486091; doi:10.1186/s13073-023-01214-2), 2023-09-07
Supplement: 13073_2023_1214_MOESM1_ESM.pdf [file 13073_2023_1214_MOESM1_ESM.pdf]

## **Additional Methods**

- **Benchmarking using a synthetic WES dataset**
- **HSP/CA expanded network**
- **WES/WGS and variant calling**
- **Variant segregation and classification**
- **Functional validation**
- **Detection of the biallelic intronic expansion AAGGG in RFC1**
- **PanelApp panels related to Hereditary Spastic Paraplegia or Ataxia**
- **Receiver Operating Characteristic (ROC)**

## **Additional Results**

- **Illustrative Clinical Cases**
  1. **Atypical phenotypes**
  2. **Novel phenotypes**
  3. **New inheritance mode**
  4. **Cases with dual diagnoses**
- **WGS cases with SNVs**
- **Benchmarking for HPO number optimisation on a real-world cohort**

## **Additional References**

## **Additional Tables**

- **Table S1. NGS diagnostic yield among published ataxia/HSP studies.**
- **Table S2. Clinical description table.**
- **Table S3. Atypical cases.**

- **Table S4. Cases with functionally validated CNVs.**
- **Table S5. ACMG criteria for identified variant classification.**
- **Table S6. List of identified genes, OMIM nomenclature and numbers of cases identified in our cohort.**
- **Table S7. Cases with functionally validated variants.**
- **Table S8. Molecular function GO terms enriched in the HSP/CA network.**
- **Table S9. Biological process GO terms enriched in the HSP/CA network.**
- **Table S10. Cellular compartment GO terms enriched in the HSP/CA network.**
- **Table S11. Candidate genes in the HSP/CA expanded network.**

## **Additional Methods**

### **Benchmarking using a synthetic WES dataset**

To test the performance of the method at identifying causal variants in sequencing data, we generated a synthetic whole exome sequencing (WES) dataset consisting of 68,210 VCF files (one for each of the pathogenic variants retrieved from the ClinVar December 2019 release). We excluded variants classified as “modifier” and in noncoding regions and those genes with HPO-gene associations below 5, resulting in 66,800 variants [1]. The synthetic dataset was created by inserting a single pathogenic variant from the set of 66,800 in high-confidence variant calls for one individual (NA12878) published by the Genome in a Bottle (GIAB) consortium, used frequently for benchmarking purposes [2]. Each pathogenic variant zygosity was adjusted to match the OMIM disease’s mode of inheritance for the associated gene (heterozygous for dominant diseases, homo or hemizygous for recessive diseases). Synthetic exomes were then filtered based on frequency ( $MAF < 0.1\%$  according to the VEP filter tool in each of the 1000 Genomes Project, NHLBI GO Exome Sequencing Project (ESP), ExAC and gnomAD) and variant impact excluding noncoding regions and modifier ones, resulting in 642 variants. We then ran ClinPrior using as an input 1) the filtered VCF files and 2) the patient phenotypic features created with the HPOs of the pathogenic variant-associated gene extracted from the HPO-gene associations from the phenotypic layer.

The prioritization process in ClinPrior is weighted by two variables: i) calculation of the phenotypic association metric derived from prior phenotype-gene association knowledge and further network propagation of this metric, and ii) calculation of the variant deleteriousness

score. Using the synthetic data from 66,800 WES, we consider four different benchmarking scenarios:

Scenario 1.

- Causal gene known (prior knowledge).
- Patient with perfect phenotypic match (all HPOs associated to the gene).

Scenario 2.

- Causal gene known (prior knowledge).
- Patient with unmatching phenotypic data (random HPOs).

Scenario 3.

- Novel candidate causal gene (removed candidate HPOs-gene associations from the 439.300 HPO-gene associations, therefore without prior knowledge)
- Patient with perfect phenotypic match (all HPOs associated to the gene).

Scenario 4.

- Novel candidate causal gene (removed candidate HPOs-gene associations from the 439.300 HPO-gene associations, therefore without prior knowledge)
- Patient with unmatching phenotypic data (random HPOs).

In the first scenario 1, we considered an ideal situation where the simulated patient's phenotype perfectly matches the clinical description from the databases associated with the causal gene. Here, the phenotypic association score is the highest possible, resulting in the desired near-perfect **top-1** identification (AUROC = 0.9994). This perfect scenario is in contrast with the rest: i) Scenario 2, with random phenotypic data, where patient phenotypic mismatch diminishes the phenotypic association metric, and the prioritization is driven mostly by the variant deleteriousness score (AUROC = 0.8393); ii) Scenario 3, with simulated novel candidate genes, removing prior HPO-gene associations of the candidate, but

with perfect patient phenotypic matching. Here, both the phenotypic metric propagation and the variant deleteriousness score are the main drivers of variant ranking (AUROC = 0.7824); and iii) Scenario 4, or worse-case scenario, with simulated novel candidate genes but with unmatched (random) patient phenotypic data. Here, only the variant deleteriousness score is the main driver of variant prioritization (AUROC=0.6489).

### **HSP/CA expanded network**

We constructed an HSP/CA expanded network with an initial list of 718 seed genes with the terms "spastic paraplegia" or "ataxia" in HPOs included in the OMIM database. Next, we used ClinPrior to obtain a list of the 1,000 prioritized genes for each seed gene after considering the HPO-gene associations of the 718-gene from the phenotypic layer as the patient. Then, we selected the most recurrent genes, with at least 75 appearances, among the 718 lists with the top 1,000 prioritized genes. With this procedure, we obtained 2,187 genes that we extracted from the global physical and functional ClinPrior networks, resulting in a final HSP/CA expanded interactome of 27,759 gene–gene interactions. Network available in the NDEx repository [3].

To assess whether there was greater connectivity in an HSP/CA expanded network than in the global network, we calculated i) the number of edges between protein pairs and ii) the average path length in the HSP/CA network by calculating the shortest paths between all protein pairs. We then compared these statistics for 1,000 permutations of a randomly selected set of 2,187 proteins derived from the global network. Finally, we calculated the Z scores to determine how far the measures of the HSP/CA expanded network deviate from the expected mean ( $\mu$ ).

To evaluate which pathways or functional categories were enriched in the HSP/CA network, we followed a similar strategy as described elsewhere [4]. Briefly, we used hypergeometric-based tests from the GOstats package [5]. We used  $p < 0.001$  as the cut-off point for GO terms with fewer than 1,000 protein members to determine which GO terms were significantly enriched.

### **WES-WGS and variant calling**

For WES analysis, capture was performed using the SeqCap EZ Human Exome Kit v3.0 (Roche Nimblegen, USA) or the SureSelect XT Human All Exon V5 50 Mb kit (Agilent, USA) with 100-bp paired-end read sequences, and for WGS, a PCR-free library with 150-bp paired-end read sequences was generated on a HiSeq 2000-4000 platform (Illumina, Inc. USA) at Centre Nacional d'Anàlisi Genòmica (CNAG Barcelona, Spain). Sequences were aligned to hg19 by Burrows–Wheeler Aligner (BWA mem), and single nucleotide variants and small insertions/deletions (indels) were identified using GATK, applying GATK's best practices for germline single nucleotide polymorphism (SNP) and indel discovery in WES [6]. Structural variants, including CNVs, were called using ClinSV v0.9[7]. CNVs for genome data were detected by ControlFreeC v11.5 [8,9] using a window size of 20 kb and a step size of 4 kb. All the variants identified by at least one tool were considered for further analysis.

### **Variant segregation and classification**

Sanger sequencing was used in all cases to confirm the findings, and for family segregation, 8 of the 11 *de novo* variants were tested in both parents. Especially for novel variants, downstream targeted inheritance testing was critical to variant classification.

The candidate variants were strictly classified following the ACMG/AMP standards and guidelines for the interpretation of sequence variants [10–12]. We used the VarSome search engine [13] to annotate the identified variants. Discrepancies in the classification in some variants when compared to VarSome are due to the finding of another pathogenic variant in trans in the same gene (PM3), a *de novo* variant (PS2, PM6), a good phenotypic fit (PP4) or functional validation (PS3). A case was considered solved if variants were classified as pathogenic or likely pathogenic. Cases with a variant of unknown significance (VUS) but compatible segregation studies and specific clinical and MRI findings highly suggestive of a given disease were also considered solved. Incidental findings were reviewed in all patients according to published guidelines [14,15].

### **Functional validation**

Several VUSs were functionally tested by different methods, including transfection assays, lipidomics, cDNA sequencing or minigene splicing assays, targeted metabolomics and mitochondrial respiration assays, patch-clamp assays to measure potassium currents, serylation assays and yeast complementation studies, mRNA and protein quantification with immunofluorescence analysis, and quantitative real-time (qRT-PCR) for CNV validation (**additional Tables S4 and Table S7**).

### **Detection of the biallelic intronic expansion AAGGG in RFC1**

Forty-three patients with negative results in WES were studied. We made the diagnosis of pathogenic biallelic expansion in RFC1 in those cases in whom 1) RP-PCR did not repeatedly amplify any product compared to healthy controls, and 2) RP-PCR showed a characteristic “sawtooth” pattern. PCR primers (F:TCAAGTGATACTCCAGCTACACCGTTGC and

R:GTGGGAGACAGGCCAATCACTTCAG) were extracted from Cortese *et al.* [16]. Polymerase chain reactions (PCRs) were performed in a final volume of 50 µl using Taq polymerase (Sigma). The amplification products were visualized after 2% agarose gel electrophoresis (1 h, 60 V). The primers used in the RP-PCR were extracted from Rafehi *et al* [17]. PCR was performed in a final volume of 50 µl using 20 ng genomic DNA, 0.8 mM of the primers CANVAS\_FAM\_2F and M13R, and 0.2 mM of the first M13R\_CANVAS\_RE\_R using Phusion FLASH High Fidelity MASTER MIX (Thermo Fisher) polymerase. Products were diluted in formamide and analysed in an ABI3730xl DNA Analyser-sequencer using GeneMapper (Applied Biosystems).

### **PanelApp panels related to Hereditary Spastic Paraplegia or Ataxia**

We examined the genes diagnosed in our real-world cohort, including pathogenic variants detected by both WES and WGS and variants in candidate genes validated by us (validated candidate), but excluding phenotype-matching VUSs, in the following 6 different PanelApp panels (<https://panelapp.genomicsengland.co.uk/>) related to hereditary spastic paraplegia or ataxia.

- Adult-onset hereditary spastic paraplegia (115 genes)
- Childhood onset hereditary spastic paraplegia (145 genes)
- Hereditary spastic paraplegia (110 genes)
- Hereditary ataxia with onset in adulthood (260 genes)
- Hereditary ataxia (178 genes)
- Hereditary ataxia and cerebellar anomalies – childhood onset (469 genes)

### **Receiver Operating Characteristic (ROC).**



The predictive performance of ClinPrior was evaluated by plotting the area under the receiver operating characteristic (AUROC) curve to assess: i) variant prioritization of known disease genes and candidate disease genes in 66,800 synthetic WES analysed, and ii) the optimal number of HPOs required for gene prioritization in 82 patients from the real-world cohort. When querying the 66,800 synthetic WES, we considered the top 50 positions of the variant ranked lists, and when querying the 82 patients (100 runs each), we considered the top 1,000 positions of the gene ranked list after average prioritization (the top ~5% of genes queried). When we look at the top 50 positions (if we do top 50 for variant prioritization (i)) and the top 1,000 positions (if we do top 1,000 for gene prioritization in HPO benchmarking (ii)), the predicted rank is progressively weighted, i.e. the AUROC decreases progressively as the prior rank increases. Thus, if ClinPrior prioritizes at position 1, the resulting AUROC is also 1, and if the rank is 10, the AUROC is 0.8163 (i) or 0.991 (ii). For a rank of 50 or higher (i) or 1,000 or higher (ii) the AUROC is 0. The pROC package in R was used to calculate AUCs along with their standard errors and 95% confidence intervals [18]. We used plotROC [19] and ggplot2 [20] packages to plot the ROC curves. The rank lists for each scenario are available on zenodo [1].

## **Additional Results**

We enrolled 135 families with undiagnosed HSP and/or CA after targeted screening for the most common genetic causes, as described in the Materials and Methods. Based on the phenotypic traits, we classified patients into several groups: i) pure spastic paraplegia, ii) pure CA, and iii) complex phenotypes presenting ataxia and/or spasticity with other symptoms (**Fig. 3A**). The probands were 85 males and 50 females, with ages ranging from 1 month to 83 years (median 32 years). The age of clinical onset ranged from the first month of life to 72

years (median 7 years); age was less than 20 years in 85 patients (63%) and more than 20 years in 50 patients. The median evolution of disease before WES testing was 9 years (1 month - 53 years), and it was longer than 10 years in 56% of patients. Consanguinity was reported in 16 families (12%).

## **Illustrative clinical cases**

### **1. Atypical phenotypes**

***GFAP* (IDSPG4):** In this family with 3 generations (the proband, a 46-year-old woman; her son; her cousin; and her cousin's son) affected by adult-onset, mild spastic paraplegia, cranial and medullar MRI findings were initially described as normal. A heterozygous novel missense variant (p.Gly18Val) in the *GFAP* gene cosegregated in all affected family members, as well as in two asymptomatic relatives (the proband's sister and her mother). Mutations in this gene cause Alexander disease (OMIM #203450) [21], an autosomal-dominant leukodystrophy with described adult presentations [22]. We therefore decided to clinically re-evaluate all family members; all of them showed clear signs of cerebellar dysfunction and spastic paraparesis, and two patients were paucisymptomatic, presenting mild alterations in neurological examinations, namely, scoliosis, nystagmus, diplopia, hyperreflexia and the Babinski sign. MRI reexamination of all patients showed notable spinal cord and medulla atrophy, in contrast to what was observed in the less affected patients, who presented mild signal changes in the trunk and less atrophy. Magnetic resonance spectroscopy showed a metabolite profile suggestive of astrocyte hypertrophy, consistent with neuroaxonal degeneration [23]. We validated this variant using a transfection assay to test the capacity of the GFAP protein encoded by the gene carrying p.Gly18Val variant to

induce protein aggregation in the astrocytoma cell Line U251-MG. We did not observe inclusions, dot-like clumps or aggregates in the p.Gly18Val-mutant construct, but we did observe abnormally large cell sizes with long astrocytic processes, a phenotype that was confirmed by quantitative image analysis. Thus, we proposed considering astrocyte hypertrophy as an additional criterion of pathogenicity in the functional evaluation of unreported variants [24].

***NDUFS6* (IDSPG55):** This patient was a 66-year-old female with spastic paraparesis, hyperreflexia and dysarthria beginning at 10 years of age, accompanied by seizures with good response to antiepileptic drugs, tremor, cavus feet, keratoconus, cataracts, vocal cord weakness, and mild developmental delay. She learned to talk at 5 years of age. Nerve conduction studies revealed axonal sensorimotor neuropathy, and cranial MRI showed a signal intensity alteration in the posterolateral portion of both lenticulate nuclei that was hyperintense in proton density and T2 images. She had an affected sister. They were born from consanguineous parents. Metabolic studies including lactate were not available. Both patients were homozygous for the splicing variant in *NDUFS6*, c.309+5G>A, classified as pathogenic according to the ACMG criteria [11,25]. This variant was previously reported in two different patients with Leigh syndrome and was validated functionally [26,27]. The clinical picture and MRI findings were compatible with Leigh syndrome. Most previous reports suggested that *NDUFS6* pathogenic variants invariably lead to neonatal or early childhood death; instead, these patients showed a slowly progressive disease, as seen in Leigh syndrome caused by mutations in other genes. To date, mutations in more than 80 genes have been found to be related to Leigh syndrome [28]. Therefore, this family expands the clinical phenotype associated with *NDUFS6*.

***ACER3 (IDSPG75)***: This patient, a 16-year-old male born to consanguineous parents, had an affected male cousin. Both had shown early-onset, slowly progressive pure spastic paraparesis and had normal MRI findings. They harbour one homozygous variant in the *ACER3* gene p.(Gly211Cys), classified as pathogenic. Only six cases of *ACER3*-related progressive leukodystrophy have been reported [29,30], and all of these patients showed severe developmental delay with neurological regression, mainly including truncal hypotonia, spasticity, dystonia, seizures, feeding problems and, except for one patient, acquired late-infantile-onset microcephaly. Regarding the imaging findings, they exhibited abnormal periventricular and deep WM signals, a thin corpus callosum and progressive atrophy. These patients had a noticeably milder disease than previously reported patients, thus expanding the clinical spectrum of patients carrying these variants.

***KIDINS220 (IDSPG18)***: This patient was a 10-year-old female with spastic paraparesis and preserved cognition. Her development was considered normal until 4 years of age. The findings of MRI performed at 10 years of age were normal. She was heterozygous for a functionally validated variant (p.Ser1352Glyfs43Ter) in *KIDINS220*. A complex-spastic paraplegia phenotype known as spastic paraplegia, intellectual disability, nystagmus, and obesity syndrome (SINO) has been related to heterozygous variants in this gene, and reports show invariably delayed psychomotor development, intellectual disability, spasticity, cerebral atrophy with reduced white matter volume, nystagmus and increased height and weight [31,32]. Furthermore, homozygous variants lead to a severe autosomal-recessive cognitive disorder characterized by the onset of arthrogyriposis and ventriculomegaly (VENARG) that is not compatible with life [33]. This patient had a noticeably milder disease than previously reported patients, thus expanding the clinical spectrum of patients carrying these variants.

**COL6A3 (IDSPG161):** This patient, a 56-year-old woman presenting with severe and congenital axonal peripheral neuropathy, developed pyramidal signs at 3 years of age. She had no previous remarkable family or personal history. We identified a homozygous variant (p.Lys2483Glu) in *COL6A3*, a gene that has been associated with Bethlem myopathy, dystonia and Ulrich congenital muscular dystrophy. More than 10 patients with this mutation have been reported [34,35]. This patient shows an atypical form because predominantly distal involvement and the pattern of neurogenic involvement in the neurophysiological study are present. Patients with both axonal neuropathy and contractures may have a collagen VI-related disorder.

**PMM2 (IDSPG123):** This patient, a 13-year-old male patient presenting with nonprogressive congenital ataxia with oculomotor apraxia associated with intellectual disability (IQ: 50), neurodevelopmental delay, and hypotonia, was born to healthy nonconsanguineous parents. MRI showed nonprogressive global cerebellar atrophy. Two variants in compound heterozygosity were found in *PMM2*, a gene associated with congenital glycosylation disorder type Ia, CDG Ia (OMIM: # 212065) [36]. The p.Arg141His variant has been reported in numerous publications as the variant most frequently found in patients with CDG Ia [37]. The intronic branch site c.640-23A>G was previously described in a patient with CDG Ia who presented this variant in compound heterozygosity with the p.Arg141His variant. The adenosine substituted in the c.640-23A> G variant is found in the sequence of the branch-site TTCAT, a highly conserved domain within intron 7 that facilitates the removal of the intron in the splicing process [38]. Strikingly, patient IDSPG123 presented a fundamental neurological phenotype and exhibited normal phosphomannomutase activity, similar to that observed in patients with other "mild" splicing variants, who can show normal values of enzymatic activity even in the presence of disease.

## 2. Novel phenotypes

***SPTANI* (IDSPG134):** This patient, a male with no relevant personal or familial antecedents, presented with pure spastic paraparesis at 7 years old. His condition was slowly progressive, and at 21 years old, he had normal MRI and nerve conduction study findings. WES detected a nonsynonymous single nucleotide variant (c.55C>T;p.Arg19Trp) in *SPTANI*, and Sanger segregation confirmed a *de novo* state. *De novo* variants in nonerythrocytic alpha-II-spectrin (*SPTANI*) cause several phenotypes, including i) early-infantile epileptic encephalopathy type 5 (OMIM #613477), an early onset epilepsy with global developmental delay and spastic quadriplegia [39]; ii) CA with hypoplastic brain structures and intellectual disability without seizures [40]; iii) late-onset hereditary motor neuropathy [41]; and iv) a neurodevelopmental phenotype with peripheral sensorimotor neuropathy [42]. A previous report suggested that biallelic *SPTANI* variants may lead to pure autosomal-recessive hereditary spastic paraparesis [43]; therefore, we performed WGS in this patient to find a second variant. WGS did not find another deleterious variant. Thus, the case of this patient further expands the phenotypic spectrum associated with *SPTANI* variants to pure spastic paraparesis with *de novo* heterozygous variants.

***LONPI* (IDSPG166):** In this family, two siblings, aged 39 and 36 years, had child-onset CA with pyramidal involvement that was slowly progressive. MRI revealed cerebellar atrophy and a dilated 4<sup>th</sup> ventricle. They had two variants in a compound heterozygous state in the *LONPI* gene, classified as pathogenic and likely pathogenic after applying ACMG criteria. A multisystemic phenotype known as CODAS, an acronym for cerebral ocular dental auricular skeletal syndrome, has been linked to this gene. Affected patients have developmental delay, craniofacial anomalies, cataracts, ptosis, a median nasal groove, delayed tooth eruption,

hearing loss, short stature, delayed epiphyseal ossification, metaphyseal hip dysplasia, and vertebral coronal clefts [44]. In this family, there are predominant neurological manifestations such as ataxia and spastic paraparesis, but these manifestations are not associated with ocular, auricular, or skeletal abnormalities. Thus, this family expands the clinical spectrum associated with *LONPI*.

***PDK3* (IDSPG172):** This patient, a 50-year-old woman presenting with severe and congenital axonal sensorimotor peripheral neuropathy, developed pyramidal signs at 13 years of age. She had no previous remarkable family or personal history. We identified a *de novo* hemizygous variant (c.473G>A) in *PDK3*, a gene that has been associated with Charcot-Marie-Tooth disease, X-linked dominant, 6. Only two patients with this mutation have been reported. The presence of spastic paraplegia had not been previously reported in Charcot-Marie-Tooth disease, X-linked dominant, 6.

### 3. New inheritance mode

***KCNA1* (IDLNF52):** This patient, an 8-year-old male presenting with a severe combination of dyskinesia and neonatal epileptic encephalopathy, was born to consanguineous parents. WES revealed a homozygous variant (p.Val368Leu) in *KCNA1*, involving a conserved residue in the pore domain, close to the selectivity signature sequence for K<sup>+</sup> ions (TVGYG). Functional analysis showed that the mutant protein alone failed to produce functional channels in the homozygous state, while the coexpression of the mutant protein with wild-type protein had no effects on K<sup>+</sup> currents, which were similar to those with wild-type protein alone. Over 50 families affected by the episodic ataxia type 1 disease spectrum have been described with mutations in *KCNA1*, encoding the voltage-gated K<sup>+</sup> channel subunit

Kv1.1. All these mutations are either transmitted in an autosomal-dominant mode or found as *de novo* events. This clinical phenotype was reported in a previous publication [45].

**SARS1 (IDSPG64):** This patient, a 14-year-old female presenting with a global developmental delay, with late acquisition of independent walking at early childhood, motor clumsiness and delayed speech, was able to produce only a few bisyllables during early childhood. Early clumsiness evolved to overt signs of spastic paraparesis that worsened slowly during middle childhood but subsequently remained stable. WES revealed a heterozygous variant (NM\_006513.4:c.969+1\_969+3del) that causes the ablation of a canonical splice site in the boundary of exon 7 and intron 7. Functional analysis showed that this change causes the inclusion of 16 intronic bp into the cDNA, which results in a loss-of-function, dominant negative effect in complementation assays in *S. cerevisiae* and serylalation assays. This family presents a novel complex spastic paraplegia phenotype and mode of inheritance (*de novo* dominant) for a variant in SARS1. This clinical phenotype was reported in a previous publication [46].

#### 4. Cases with dual diagnoses

**POLR3A and CACNA1A (IDLNF56):** This patient, a 15-year-old female, presented with moderate intellectual disability, ADHD, behavioural abnormalities (obsessions, mood disorder, emotional lability, visual hallucinations), and absence and myoclonic seizures beginning at thirteen years old. She also had nystagmus, strabismus and instability starting in the first years of life. MRI showed periventricular heterogeneous T2 WM hyperintensities and hypointensity in the globus pallidus, thalamic anterolateral nuclei, dentate nuclei, optic radiations, and pyramidal tracts, with mild atrophy of the cerebellar superior vermis. WES



analysis identified two variants in *POLR3A* in compound heterozygosis, classified as pathogenic (c.2171G>A;p.Cys724Tyr) and likely pathogenic (c.2113C>G;p.Pro705Ala), as well as a heterozygous LoF variant in *CACNA1A* (c.1637dup;p.Tyr546Ter) that was revealed to be *de novo* after the segregation study. The patient's clinical picture could be more related to the variant in *CACNA1A*, but the radiological pattern was more consistent with the *POLR3A* variant.

### **WGS cases with SNVs**

We obtained a positive WGS diagnosis for 3 additional families with SNVs in the *SPG7*, *SPTBN2* and *SPTAN1* genes. In one case (IDSPG21), we found a deep intronic splicing variant in the second allele (c.286+853A>G in *SPG7*) [47]. In a second case (IDSPG125), a single pathogenic variant in one allele was detected in *SPTBN2*, a gene in which both autosomal-dominant and autosomal-recessive modes of inheritance with the same phenotype of CA had been described (spinocerebellar ataxia, autosomal recessive 14, SCAR14, OMIM #615386 and spinocerebellar ataxia 5, SCA5, OMIM #600224). The absence of findings in WGS ascertained a dominant inheritance mode in this family. Finally, in a third patient (IDSPG134) with pure spastic paraplegia harbouring a single *de novo* variant in *SPTAN1* (of described dominant inheritance for a developmental phenotype or recessive for complex spastic paraplegia), WGS ruled out a second variant in trans, thus uncovering a novel phenotype linked to a dominant inheritance mode.

### **Benchmarking for HPO number optimisation on a real-world cohort.**

We performed a benchmark using the 82 causal genes from the real-world cohort patients and their associated HPOs to determine the number of HPOs required for optimal prioritization of

the genes causing the patient's phenotype. For each patient (x), we ran ClinPrior with an increasing number of HPOs (2, 3, 4, until we reached the maximum number of HPOs available from each patient, number of HPOs = z). For each z (2 or 3 or 4 HPOs...), we ran ClinPrior 100 times for each patient (x) with HPOs randomly selected from the patient's total HPOs. The predictive performance of ClinPrior was evaluated by plotting the AUROC to assess the optimal number of HPOs. **Fig. S1** shows that the AUROCs improve as number of HPOs (z) increases.

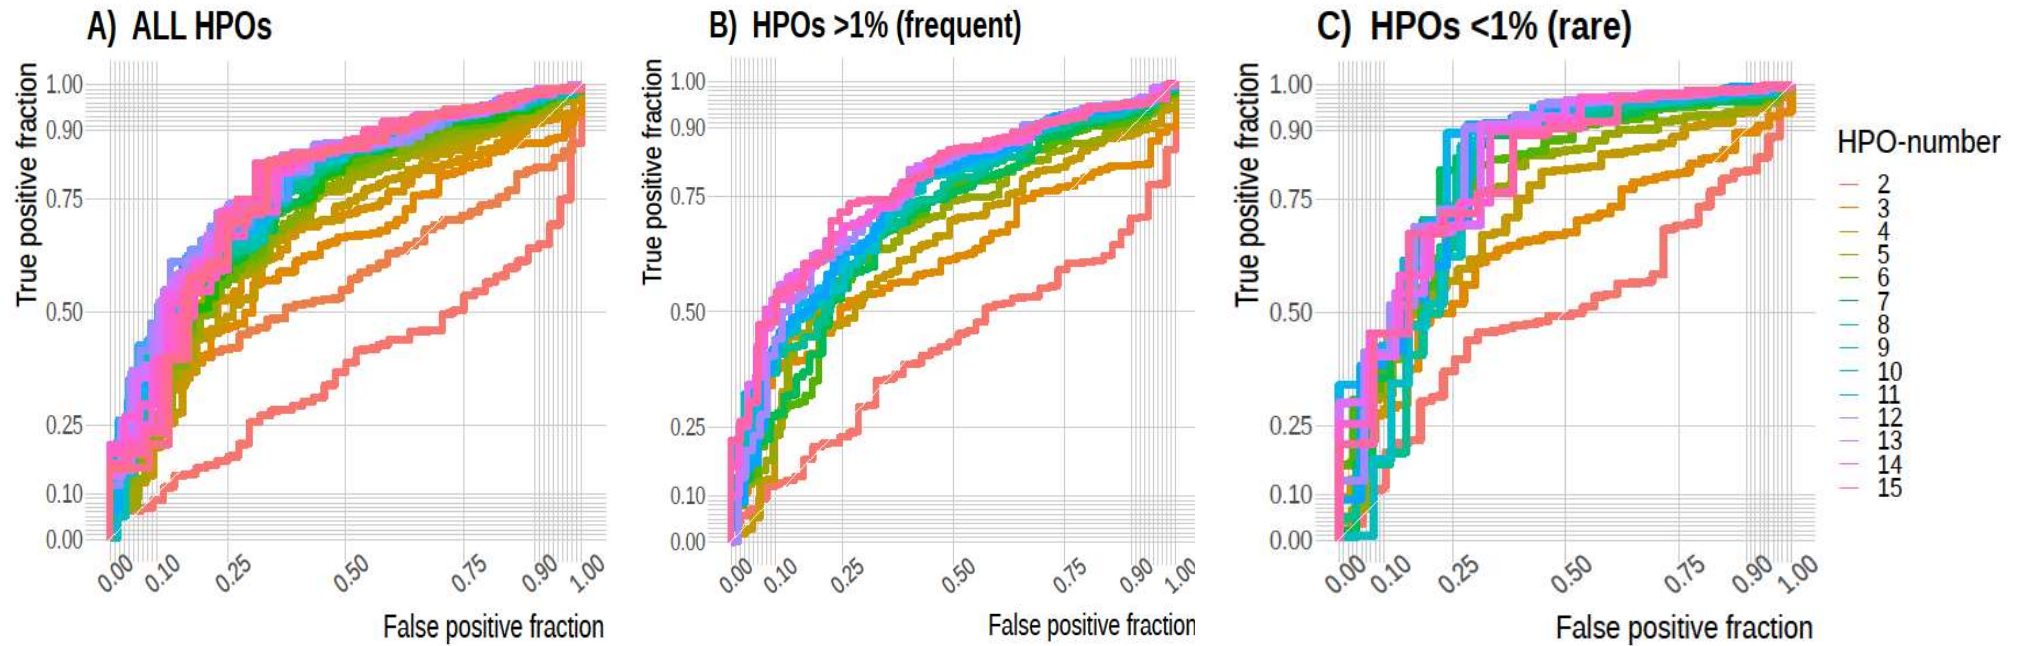

**Fig. S1: Gene rank yield by HPOs number.** Gene prioritization performance by area under the receiver operating characteristic curve (AUROC) in identifying the optimal number of HPOs. Each ROC curve represents the prioritization performance using a different set of HPOs from each patient, ranging from 2 to 30 randomly selected HPOs. The curves were calculated by integrating 100 runs per patient (82 patients) and considering only the top 1,000 positions (the top ~5% of genes interrogated) with progressive weighting in the prioritization rank. A) All HPOs. B) high-frequency (>1%) HPOs. C) low-frequency (<1%) HPOs.

We assessed whether the optimal number of HPOs varied when the HPOs were more or less specific. Therefore, we divided the HPOs of each patient into two groups according to whether the normalised frequency of each HPO term within the 439,379 gene-HPO associations was less than or greater than 1%. We re-ran ClinPrior 100 times for each patient (x) and increasing number of HPOs (z), but now selecting either common (>1%) or rare (<1%) HPOs. We evaluated the performance by looking at the ROC and once again, we observed that as the number of HPOs increased, the AUROCs improved. Of note, when the HPOs are more specific (less frequent), results improve (AUROC = 0.844 with 10 HPOs). Further, in a situation with both specific and unspecific HPOs, we observe that with a number of HPOs around 20, the yield is close to the best results of scenario with specific HPOs (AUROC=0.790 with 24 HPOs).

Similar performance was obtained when evaluating the frequency of gene prioritization ranks (<1%, <5%, <10%, <20% and >20% of 23,511 total genes) in the same three scenarios: i) no HPO frequency constraint (mix of specific and non-specific terms), ii) HPO frequency above 1% and iii) HPO frequency below 1% (**Fig. S2**). Optimal prioritization performance was achieved with about 7 to 10 HPOs in a rare scenario. In conclusion, we recommend using as many HPOs as possible, but using specific (below 1%) HPOs is also more informative. Interestingly, using common HPOs (more frequent than 1%) does not compromise accurate prioritization, and using a mix of at least 15 specific and non-specific HPOs, ClinPrior can still perform accurate prioritization with similar diagnostic yield as using 7-10 specific HPOs.

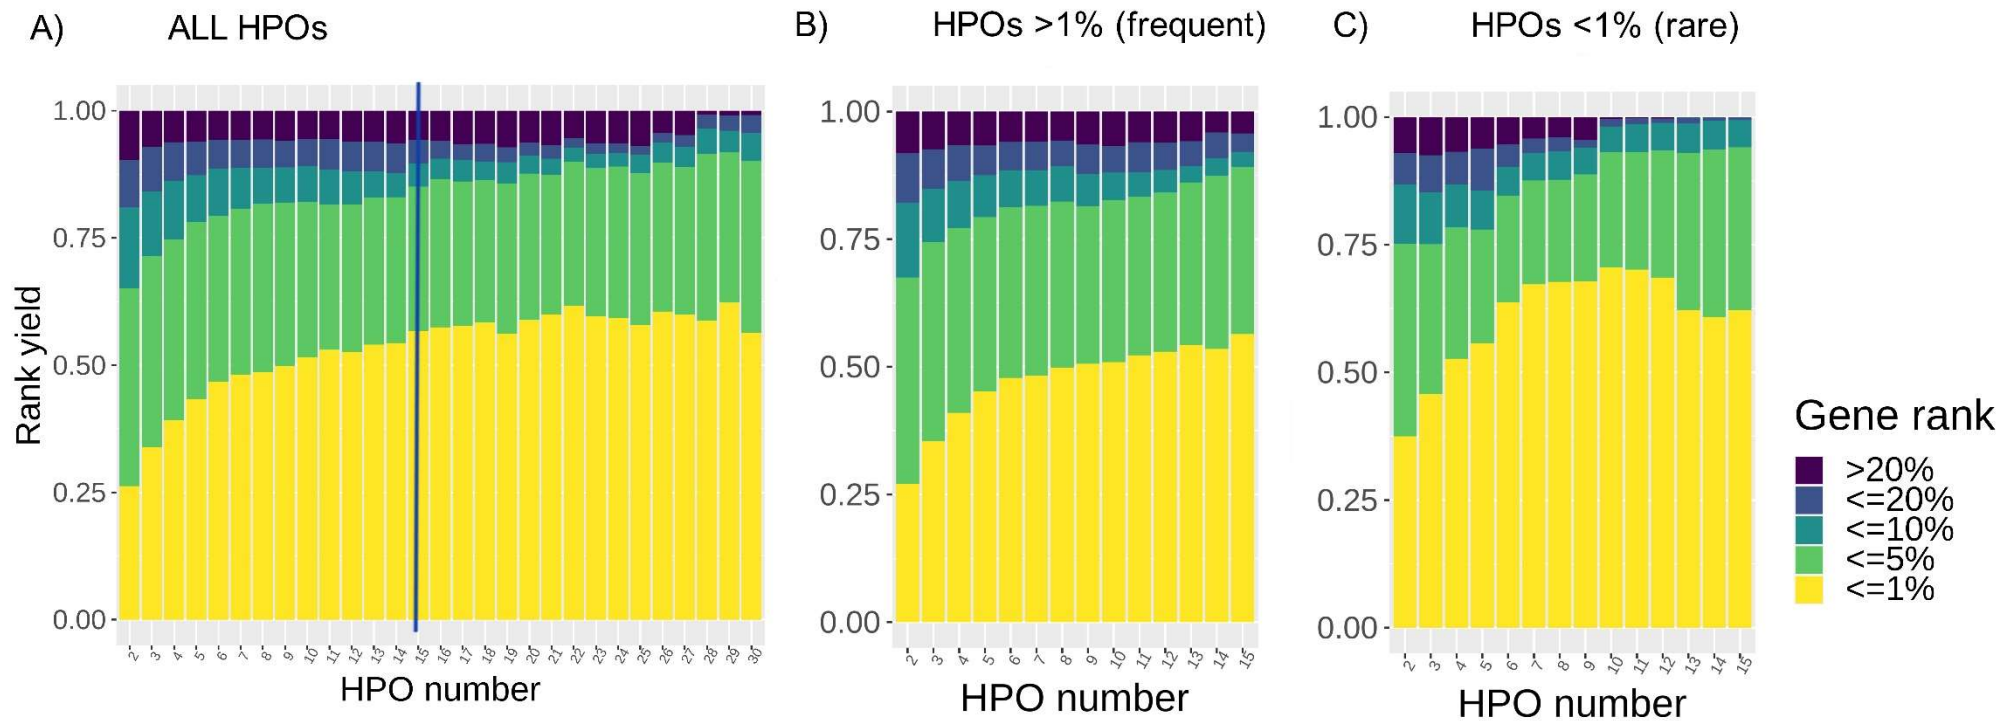

**Fig. S2: ClinPrior performance by HPO number.** Prioritization yield in ranking 82 causal genes to top positions: <1%, <5%, <10%, <20% and >20% (out of 23,511 total genes). The three stacked bar plots show the frequency of gene ranks as the number of HPOs increases. In plot (A) there is no constraint on HPO frequency, and in plots (B) and (C) there is a constraint with HPO frequencies >1% and <1%, respectively. The difference in the maximum number of HPOs displayed is because in a patient with an average of 30 HPOs (A), approximately 15 will have a frequency >1% (B) and the remaining 15 will have a frequency <1% (C).

## Additional References

1. Schlüter A. ClinPrior: An algorithm for diagnosis and novel gene discovery by network-based prioritization [Internet]. Zenodo. 2023. Available from: <https://zenodo.org/record/7945507>
2. Zook JM, Chapman B, Wang J, Mittelman D, Hofmann O, Hide W, et al. Integrating human sequence data sets provides a resource of benchmark SNP and indel genotype calls. *Nature Biotechnology* 2014 32:3 [Internet]. 2014 [cited 2022 May 11];32:246–51. Available from: <https://www.nature.com/articles/nbt.2835>
3. Schlüter A. Hereditary spastic paraplegias expanded network [Internet]. NDEX. 2023. Available from: <https://www.ndexbio.org/index.html#/network/9a5c7fd0-e61f-11eb-b666-0ac135e8bacf?accesskey=d786cfb7addf9e47df34e3c149d6eb7e3c728a97bcfa8f4676a8dda072365e1c>
4. Schlüter A, Espinosa L, Fourcade S, Galino J, Lopez E, Ilieva E, et al. Functional genomic analysis unravels a metabolic-inflammatory interplay in adrenoleukodystrophy. *Hum Mol Genet.* 2012;21:1062–77.
5. Falcon S, Gentleman R. Using GOstats to test gene lists for GO term association. *Bioinformatics.* 2007;23:257–8.
6. Auwera GAV der., O'Connor BD. Genomics in the Cloud : Using Docker, GATK, and WDL in Terra. :502.
7. Minoche AE, Lundie B, Peters GB, Ohnesorg T, Pinese M, Thomas DM, et al. ClinSV: clinical grade structural and copy number variant detection from whole genome sequencing data. *Genome Med.* 2021;13.
8. Boeva V, Zinovyev A, Bleakley K, Vert JP, Janoueix-Lerosey I, Delattre O, et al. Control-free calling of copy number alterations in deep-sequencing data using GC-content normalization. *Bioinformatics.* 2011;27.
9. Boeva V, Popova T, Bleakley K, Chiche P, Cappo J, Schleiermacher G, et al. Control-FREEC: A tool for assessing copy number and allelic content using next-generation sequencing data. *Bioinformatics.* 2012;28.
10. Brandt T, Sack LM, Arjona D, Tan D, Mei H, Cui H, et al. Adapting ACMG/AMP sequence variant classification guidelines for single-gene copy number variants. *Genetics in Medicine.* 2020;22:336–44.
11. Amendola LM, Jarvik GP, Leo MC, McLaughlin HM, Akkari Y, Amaral MD, et al. Performance of ACMG-AMP Variant-Interpretation Guidelines among Nine Laboratories in the Clinical Sequencing Exploratory Research Consortium. *Am J Hum Genet.* 2016;98:1067–76.
12. Richards S, Aziz N, Bale S, Bick D, Das S, Gastier-Foster J, et al. Standards and guidelines for the interpretation of sequence variants: a joint consensus recommendation of the American College of Medical Genetics and Genomics and the Association for Molecular Pathology. *Genetics in Medicine.* 2015;17:405–24.
13. Kopanos C, Tsiolkas V, Kouris A, Chapple CE, Albarca Aguilera M, Meyer R, et al. VarSome: the human genomic variant search engine. *Bioinformatics.* 2019;35:1978–80.
14. Kalia SS, Adelman K, Bale SJ, Chung WK, Eng C, Evans JP, et al. Recommendations for reporting of secondary findings in clinical exome and genome sequencing, 2016 update (ACMG SF v2.0): A policy statement of the American College of Medical Genetics and Genomics. *Genetics in Medicine.* 2017;19:249–55.
15. Miller DT, Lee K, Chung WK, Gordon AS, Herman GE, Klein TE, et al. ACMG SF v3.0 list for reporting of secondary findings in clinical exome and genome sequencing: a policy statement of the American College of Medical Genetics and Genomics (ACMG). *Genetics in Medicine.* 2021;

16. Cortese A, Simone R, Sullivan R, Vandrovcova J, Tariq H, Yau WY, et al. Biallelic expansion of an intronic repeat in RFC1 is a common cause of late-onset ataxia. *Nat Genet.* 2019;51.
17. Rafehi H, Szmulewicz DJ, Bennett MF, Sobreira NLM, Pope K, Smith KR, et al. Bioinformatics-Based Identification of Expanded Repeats: A Non-reference Intronic Pentamer Expansion in RFC1 Causes CANVAS. *The American Journal of Human Genetics.* 2019;105.
18. Robin X, Turck N, Hainard A, Tiberti N, Lisacek F, Sanchez JC, et al. pROC: an open-source package for R and S+ to analyze and compare ROC curves. *BMC Bioinformatics* [Internet]. 2011;12:77. Available from: [http://www.ncbi.nlm.nih.gov/entrez/query.fcgi?cmd=Retrieve&db=PubMed&dopt=Citation&list\\_uids=21414208](http://www.ncbi.nlm.nih.gov/entrez/query.fcgi?cmd=Retrieve&db=PubMed&dopt=Citation&list_uids=21414208)
19. Sachs MC. PlotROC: A tool for plotting ROC curves. *J Stat Softw.* 2017;79.
20. Wickham H. *ggplot2 - Elegant Graphics for Data Analysis* | Hadley Wickham | Springer. Springer Science & Business Media. 2017.
21. Brenner M, Johnson AB, Boespflug-Tanguy O, Rodriguez D, Goldman JE, Messing A. Mutations in GFAP, encoding glial fibrillary acidic protein, are associated with Alexander disease. *Nat Genet.* 2001;27:117–20.
22. Pareyson D, Fancellu R, Mariotti C, Romano S, Salmaggi A, Carella F, et al. Adult-onset Alexander disease: a series of eleven unrelated cases with review of the literature. *Brain.* 2008;131:2321–31.
23. Brockmann K, Dechent P, Meins M, Haupt M, Sperner J, Stephani U, et al. Cerebral proton magnetic resonance spectroscopy in infantile Alexander disease. *J Neurol.* 2003;250.
24. Casanovas C, Verdura E, Vélez V, Schlüter A, Pons-Escoda A, Homedes C, et al. A novel mutation in the *GFAP* gene expands the phenotype of Alexander disease. *J Med Genet.* 2019;jmedgenet-2018-105959.
25. Richards S, Aziz N, Bale S, Bick D, Das S, Gastier-Foster J, et al. Standards and guidelines for the interpretation of sequence variants: A joint consensus recommendation of the American College of Medical Genetics and Genomics and the Association for Molecular Pathology. *Genetics in Medicine.* 2015;17:405–24.
26. Ogawa E, Shimura M, Fushimi T, Tajika M, Ichimoto K, Matsunaga A, et al. Clinical validity of biochemical and molecular analysis in diagnosing Leigh syndrome: a study of 106 Japanese patients. *J Inherit Metab Dis.* 2017;40.
27. Rouzier C, Chaussenot A, Fragaki K, Serre V, Ait-El-Mkadem S, Richelme C, et al. NDUFS6 related Leigh syndrome: a case report and review of the literature. *J Hum Genet.* 2019;64.
28. Rahman J, Noronha A, Thiele I, Rahman S. Leigh map: A novel computational diagnostic resource for mitochondrial disease. *Ann Neurol.* 2017;81.
29. Dehnavi AZ, Heidari E, Rasulinezhad M, Heidari M, Ashrafi MR, Hosseini MM, et al. ACER3-related leukoencephalopathy: expanding the clinical and imaging findings spectrum due to novel variants. *Hum Genomics.* 2021;15.
30. Edvardson S, Yi JK, Jalas C, Xu R, Webb BD, Snider J, et al. Deficiency of the alkaline ceramidase ACER3 manifests in early childhood by progressive leukodystrophy. *J Med Genet.* 2016;53:389–96.
31. Josifova DJ, Monroe GR, Tessadori F, de Graaff E, van der Zwaag B, Mehta SG, et al. Heterozygous *KIDINS220/ARMS* nonsense variants cause spastic paraplegia, intellectual disability, nystagmus, and obesity. *Hum Mol Genet.* 2016;25.
32. Schmieg N, Thomas C, Yabe A, Lynch DS, Iglesias T, Chakravarty P, et al. Novel Kidins220/ARMS Splice Isoforms: Potential Specific Regulators of Neuronal and Cardiovascular Development. *PLoS One.* 2015;10.

33. Mero I-L, Mørk HH, Sheng Y, Blomhoff A, Opheim GL, Erichsen A, et al. Homozygous KIDINS220 loss-of-function variants in fetuses with cerebral ventriculomegaly and limb contractures. *Hum Mol Genet.* 2017;26.
34. Stavusis J, Micule I, Wright NT, Straub V, Topf A, Panadés-de Oliveira L, et al. Collagen VI-related limb-girdle syndrome caused by frequent mutation in COL6A3 gene with conflicting reports of pathogenicity. *Neuromuscul Disord* [Internet]. 2020 [cited 2023 Jan 26];30:483–91. Available from: <https://pubmed.ncbi.nlm.nih.gov/32448721/>
35. Briñas L, Richard P, Quijano-Roy S, Gartioux C, Ledeuil C, Lacène E, et al. Early onset collagen VI myopathies: Genetic and clinical correlations. *Ann Neurol* [Internet]. 2010 [cited 2023 Jan 26];68:511–20. Available from: <https://onlinelibrary.wiley.com/doi/full/10.1002/ana.22087>
36. Jaeken J, Eggermont E, Stibler H. AN APPARENT HOMOZYGOUS X-LINKED DISORDER WITH CARBOHYDRATE-DEFICIENT SERUM GLYCOPROTEINS. *The Lancet.* 1987;330.
37. Kjaergaard S. Congenital disorder of glycosylation type Ia (CDG-Ia): phenotypic spectrum of the R141H/F119L genotype. *Arch Dis Child.* 2001;85.
38. Vuillaumier-Barrot S, Le Bizec C, De Lonlay P, Madinier-Chappat N, Barnier A, Dupré T, et al. PMM2 intronic branch-site mutations in CDG-Ia. *Mol Genet Metab.* 2006;87.
39. Saitsu H, Tohyama J, Kumada T, Egawa K, Hamada K, Okada I, et al. Dominant-Negative Mutations in  $\alpha$ -II Spectrin Cause West Syndrome with Severe Cerebral Hypomyelination, Spastic Quadriplegia, and Developmental Delay. *The American Journal of Human Genetics.* 2010;86.
40. Gartner V, Markello TC, Macnamara E, De Biase A, Thurm A, Joseph L, et al. Novel variants in *SPTANI* without epilepsy: An expansion of the phenotype. *Am J Med Genet A.* 2018;
41. Beijer D, Deconinck T, De Bleecker JL, Dotti MT, Malandrini A, Urtizberea JA, et al. Nonsense mutations in alpha-II spectrin in three families with juvenile onset hereditary motor neuropathy. *Brain.* 2019;142.
42. Ylikallio E, Ritari N, Sainio M, Toppila J, Kivirikko S, Tyynismaa H, et al. *De novo* *SPTANI* mutation in axonal sensorimotor neuropathy and developmental disorder. *Brain.* 2020;143.
43. Leveille E, Estiar MA, Krohn L, Spiegelman D, Dionne-Laporte A, Dupré N, et al. *SPTAN1* variants as a potential cause for autosomal recessive hereditary spastic paraplegia. *J Hum Genet.* 2019;64.
44. Strauss KA, Jinks RN, Puffenberger EG, Venkatesh S, Singh K, Cheng I, et al. CODAS Syndrome Is Associated with Mutations of LONP1, Encoding Mitochondrial AAA+ Lon Protease. *The American Journal of Human Genetics.* 2015;96.
45. Verdura E, Fons C, Schlüter A, Ruiz M, Fourcade S, Casasnovas C, et al. Complete loss of *KCNA1* activity causes neonatal epileptic encephalopathy and dyskinesia. *J Med Genet.* 2020;57.
46. Verdura E, Senger B, Raspall-Chaure M, Schlüter A, Launay N, Ruiz M, et al. Loss of seryl-tRNA synthetase ( *SARS1*) causes complex spastic paraplegia and cellular senescence. *J Med Genet* [Internet]. 2022 [cited 2022 Aug 31];jmedgenet-2022-108529. Available from: <https://pubmed.ncbi.nlm.nih.gov/36041817/>
47. Verdura E, Schlüter A, Fernández-Eulate G, Ramos-Martín R, Zulaica M, Planas-Serra L, et al. A deep intronic splice variant advises reexamination of presumably dominant *SPG7* Cases. *Ann Clin Transl Neurol.* 2020;7.
48. Oladnabi M, Musante L, Larti F, Hu H, Abedini SS, Wienker T, et al. New evidence for the role of calpain 10 in autosomal recessive intellectual disability: Identification of two novel nonsense variants by exome sequencing in Iranian families. *Arch Iran Med.* 2015;18.



49. Djordjevic D, Pinard M, Gauthier MS, Smith-Hicks C, Hoffman TL, Wolf NI, et al. De novo variants in POLR3B cause ataxia, spasticity, and demyelinating neuropathy. *Am J Hum Genet*; 2021;108:186–93.
50. Guasto A, Dubail J, Aguilera-Albesa S, Paganini C, Vanhulle C, Haouari W, et al. Biallelic variants in SLC35B2 cause a novel chondrodysplasia with hypomyelinating leukodystrophy. *Brain*. 2022;145.
51. Soehn AS, Rattay TW, Beck-Wödl S, Schäferhoff K, Monk D, Döbler-Neumann M, et al. Uniparental disomy of chromosome 16 unmasks recessive mutations of FA2H /SPG35 in 4 families. *Neurology*. 2016;87.
52. Rattay TW, Lindig T, Baets J, Smets K, Deconinck T, Söhn AS, et al. FAHN/SPG35: a narrow phenotypic spectrum across disease classifications. *Brain*. 2019;142:1561–72.
53. Vélez-Santamaría V, Verdura E, Macmurdo C, Planas-Serra L, Schlüter A, Casas J, et al. Expanding the clinical and genetic spectrum of PCYT2-related disorders. *Brain*. 2020;143.
54. Verdura E, Rodríguez-Palmero A, Vélez-Santamaria V, Planas-Serra L, de la Calle I, Raspall-Chaure M, et al. Biallelic PI4KA variants cause a novel neurodevelopmental syndrome with hypomyelinating leukodystrophy. *Brain*. 2021;
55. García-Cazorla À, Verdura E, Juliá-Palacios N, Anderson EN, Goicoechea L, Planas-Serra L, et al. Impairment of the mitochondrial one-carbon metabolism enzyme SHMT2 causes a novel brain and heart developmental syndrome. *Acta Neuropathol*. 2020;140.

**Table S1**

| Reference               | Article                                                                                                                                                                          | Total families | Families with definitive positive result | Diagnostic Yield | Clinically relevant variant (adding VUS) | % Detection of clinically relevant variants | Population characteristics                                                                                                                                                                                                                     | PMID     |
|-------------------------|----------------------------------------------------------------------------------------------------------------------------------------------------------------------------------|----------------|------------------------------------------|------------------|------------------------------------------|---------------------------------------------|------------------------------------------------------------------------------------------------------------------------------------------------------------------------------------------------------------------------------------------------|----------|
| da Graça, 2021          | Diagnostic Yield of Whole Exome Sequencing for Adults with Ataxia: a Brazilian Perspective                                                                                       | 76             | 25                                       | 33%              | VUS no reported                          |                                             | Non-Caucasian ataxia adult population. In Cerebellar ataxia with Pyramidal signs subgroup, WES showed a better performance.                                                                                                                    | 33956305 |
| Kim, 2020               | Clarification of undiagnosed ataxia using whole-exome sequencing with clinical implications                                                                                      | 68             | 18                                       | 26%              | 32                                       | 47%                                         | WES in Korean patients with either a positive family history of ataxia or an onset age <50 years. SPG7 and SPG11 were the most common diagnoses.                                                                                               | 32961395 |
| Hengel, 2020            | First-line exome sequencing in Palestinian and Israeli Arabs with neurological disorders is efficient and facilitates disease gene discovery                                     | 83             | 35                                       | 42%              | 42                                       | 51%                                         | WES in highly consanguineous cohort with neurological disorders (at least 2 affected members)                                                                                                                                                  | 32214227 |
| Ngo, 2020               | A diagnostic ceiling for exome sequencing in cerebellar ataxia and related neurological disorders                                                                                | 260            | 65                                       | 25%              | 135                                      | 52%                                         | Mostly sporadic adult onset spastic paraplegia or cerebellar ataxia. WES + CNV / STR analysis                                                                                                                                                  | 31692161 |
| Kim, 2019               | Increased Diagnostic Yield of Spastic Paraplegia with or Without Cerebellar Ataxia Through Whole-Genome Sequencing                                                               | 18             | 7                                        | 39%              | VUS no reported                          |                                             | WGS in Spastic Paraplegia with or without cerebellar ataxia                                                                                                                                                                                    | 31104286 |
| Mu, 2019                | The utility of whole exome sequencing in diagnosing neurological disorders in adults from a highly consanguineous population                                                     | 24             | 13                                       | 54%              | VUS no reported                          |                                             | Adults with undiagnosed neurologic disorders (mostly ataxia and developmental delay) with consanguinity. AR disorders comprised 77% of diagnoses, due to homozygous variants.                                                                  | 30724636 |
| De Souza, 2017          | New genetic causes for complex hereditary spastic paraplegia                                                                                                                     | 17             | 12                                       | 71%              | VUS no reported                          |                                             | Complex HSP. 10 known variants and 2 new variants (in silico) in genes not related to HSP previously.                                                                                                                                          | 28716262 |
| Nibbeling, 2017         | Exome sequencing and network analysis identifies shared mechanisms underlying spinocerebellar ataxia                                                                             | 20             | 9                                        | 45%              | VUS no reported                          |                                             | WES in hereditary ataxias, validation of 5 new genes.                                                                                                                                                                                          | 29053796 |
| <b>PRE- ACMG</b>        |                                                                                                                                                                                  |                |                                          |                  |                                          |                                             |                                                                                                                                                                                                                                                |          |
| Kuperberg, 2016         | Utility of Whole Exome Sequencing for Genetic Diagnosis of Previously Undiagnosed Pediatric Neurology Patients                                                                   | 57             | 28                                       | 49%              |                                          |                                             | Utility of WES in neurogenetic disorders. (Symptoms: GDD, ataxia:57%, muscular, seizures, dystonia) Change of treatment in 5 patients.                                                                                                         | 27572814 |
| Van de Warrenburg, 2016 | Clinical exome sequencing for cerebellar ataxia and spastic paraplegia uncovers novel gene-disease associations and unanticipated rare disorders                                 | 76             | 26                                       | 34%              |                                          |                                             | Clinical exome (200 genes) in familial HSP and CA (AO<45 or >1 affected) Reveals 'old' gene-'new' disease associations (SPG7-CA, TH-HSP) and uncovers unanticipated disorders.                                                                 | 27165006 |
| Kara, 2015              | Genetic and phenotypic characterization of complex hereditary spastic paraplegia                                                                                                 | 66             | 20                                       | 30%              |                                          |                                             | Clinical exome 26%: 97 cHSP. 1) SPG11 (MLPA)-> 30 (30%). 2) clinical exome in 20/66: 26 (4813 genes) + 7 WES. Characterizes an extensive SPG11 cohort.                                                                                         | 27217339 |
| Pyle, 2015              | Exome sequencing in undiagnosed inherited and sporadic ataxias                                                                                                                   | 22             | 9                                        | 41%              |                                          |                                             | DY WES in Ataxia: 64% (9/22 European fam, CO and AO) PreACMG: 41% path, 23% probably path). De novo mutations, validated disease genes previously described in isolated families, and broadened the clinical phenotype of known disease genes. | 25497598 |
| Farwell, 2014           | Enhanced utility of family-centered diagnostic exome sequencing with inheritance model-based analysis: results from 500 unselected families with undiagnosed genetic conditions. | 500            | 152                                      | 30%              |                                          |                                             | DY WES in neurogenetic disorders: 30% PreACMG. Ataxias DY:44%. Diagnostic rate was significantly higher among trio (37%) compared with singleton (21%)                                                                                         | 25356970 |
| Novarino, 2014          | Exome Sequencing Links Corticospinal Motor Neuron Disease to Common Neurodegenerative Disorders                                                                                  | 55             | 18                                       | 33%              |                                          |                                             | DY WES in SPG: 55 fam AR: 18 previously unknown HSP genes, identified and validated (functionally in zebra fish or genetically).                                                                                                               | 24482476 |
| Fogel, 2014             | Exome sequencing in the clinical diagnosis of sporadic or familial cerebellar ataxia                                                                                             | 76             | 16                                       | 21%              |                                          |                                             | DY in cerebellar ataxia (predominantly adult sporadic onset)                                                                                                                                                                                   | 25133958 |
| Ohba, 2013              | Diagnostic utility of whole exome sequencing in patients showing cerebellar and/or vermis atrophy in childhood                                                                   | 23             | 9                                        | 39%              |                                          |                                             | DY WES in children with Cerebellar Atrophy.                                                                                                                                                                                                    | 24091540 |

**Table S1.** NGS diagnostic yield among published ataxia/HSP studies.

Table S2

| Gene                    | ID        | Sex    | Age | Age at onset | Affected relatives               | Consanguinity | Inheritance mode              | Pyramidal involvement   | Cerebellar involvement | Neuropathy                                       | Cognitive / Behaviour     | Extrapyramidal features | Seizures            | MRI findings                                                           | Other findings (exam or investigation tests)                  | Diagnostic technique | Treatment                                  |
|-------------------------|-----------|--------|-----|--------------|----------------------------------|---------------|-------------------------------|-------------------------|------------------------|--------------------------------------------------|---------------------------|-------------------------|---------------------|------------------------------------------------------------------------|---------------------------------------------------------------|----------------------|--------------------------------------------|
| <i>ACER3</i>            | IDSPG75   | Female | 16  | 1            | YES (brother)                    | YES           | AR (Homozygous)               | Pure spastic paraplegia | None                   | None                                             | None                      | None                    | None                | Normal                                                                 | None                                                          | WES                  |                                            |
| <i>ALS2</i>             | IDSPG74   | Female | 11  | 3            | None                             | YES           | AR (Homozygous)               | Spastic paraparesis     | None                   | None                                             | GDD + learning difficulty | None                    | None                | Normal                                                                 | None                                                          | WES                  |                                            |
| <i>AMPD2</i>            | IDSPG78   | Male   | 34  | 0            | None                             | None          | AR (Homozygous)               | Spastic paraparesis     | None                   | Axonal sensory neuropathy                        | GDD + ID                  | None                    | None                | Normal                                                                 | None                                                          | WES                  |                                            |
| <i>AP4B1</i>            | IDSPG167  | Female | 47  | 20           | None                             | None          | AR (Compound Heterozygous)    | Spastic paraparesis     | Ataxia                 | None                                             | None                      | Head tremor             | Abdominal myoclonus | Normal                                                                 | None                                                          | WES                  |                                            |
| <i>ATL1</i>             | IDSPG5    | Male   | 40  | 10           | YES (three affected generations) | None          | AD                            | Spastic paraparesis     | None                   | Distal hereditary motor neuropathy               | None                      | None                    | None                | Normal                                                                 | None                                                          | WES                  |                                            |
| <i>ATL1</i>             | IDSPG70   | Female | 8   | 2            | YES (three affected generations) | None          | AD                            | Spastic paraparesis     | None                   | None                                             | None                      | None                    | None                | Normal                                                                 | Seborrheic dermatitis                                         | WES                  |                                            |
| <i>ATL1</i>             | IDSPG168  | Male   | 10  | 1            | None                             | None          | AD                            | Spastic paraparesis     | None                   | None                                             | Learning disability       | None                    | None                | Normal                                                                 | None                                                          | WES                  |                                            |
| <i>BCKDK</i>            | IDSPG47.0 | Male   | 45  | 12           | YES (sister)                     | YES           | AR (Homozygous)               | Spastic paraparesis     | None                   | None                                             | GDD + ID                  | None                    | Seizures            | Frontal T2 WM HI, caudate nuclei HI, enlarged IV ventricle             | None                                                          | WES (Reanalysis)     | BCAA supplementation and high-protein diet |
| <i>BSCL2</i>            | IDSPG29   | Male   | 48  | 2            | YES (mother)                     | None          | AD                            | Spastic paraparesis     | None                   | Demyelinating sensorimotor peripheral neuropathy | None                      | None                    | None                | Normal                                                                 | None                                                          | WES                  |                                            |
| <i>BSCL2</i>            | IDSPG112  | Male   | 34  | 12           | YES (three affected generations) | None          | AD                            | Pyramidal signs         | None                   | Axonal sensorimotor peripheral neuropathy        | None                      | None                    | None                | Normal                                                                 | None                                                          | WES                  |                                            |
| <i>BSCL2</i>            | IDSPG145  | Male   | 71  | 57           | YES (two affected generations)   | None          | AD                            | None                    | None                   | Distal hereditary motor neuropathy               | None                      | None                    | None                | Cerebellar atrophy                                                     | None                                                          | WES                  |                                            |
| <i>BSCL2</i>            | IDSPG157  | Female | 63  | 57           | None                             | None          | AD                            | Pure spastic paraplegia | None                   | None                                             | None                      | None                    | None                | Normal                                                                 | None                                                          | WES                  |                                            |
| <i>CACNA1A</i>          | IDSPG126  | Male   | 17  | 1            | YES (sister)                     | None          | AD                            | None                    | Episodic Ataxia        | None                                             | None                      | None                    | Seizures            | Vermian atrophy                                                        | EEG: Centroparietal epileptiform discharges                   | WES (Reanalysis)     |                                            |
| <i>CACNA1A / POLR3A</i> | IDLNF56   | Female | 16  | 1            | None                             | None          | AD/AR (Compound Heterozygous) | Spastic paraparesis     | Ataxia                 | None                                             | GDD + behaviour disorder  | None                    | YES                 | Periventricular T2 WM HI                                               | Hepatic steatosis, obesity, amenorrhea, hypertrichosis        | WES                  |                                            |
| <i>CAPN1</i>            | IDSPG2    | Male   | 62  | 40           | YES (brother)                    | None          | AR (Homozygous)               | Spastic paraparesis     | None                   | None                                             | None                      | None                    | None                | Periventricular T2 WM HI<br>Cerebral atrophy                           | None                                                          | WES                  |                                            |
| <i>CC2D2A</i>           | IDLNF129  | Male   | 6   | 1            | None                             | YES           | AR (Compound Heterozygous)    | None                    | Ataxia                 | None                                             | GDD + ASD                 | None                    | None                | Dysplastic cerebellar vermis                                           | High hydroxybutyrate, normalized later. Abnormal VEP          | WES                  |                                            |
| <i>COL4A3</i>           | IDSPG161  | Female | 56  | 3            | None                             | None          | AR (Homozygous)               | Pyramidal signs         | None                   | Distal hereditary motor neuropathy               | None                      | None                    | None                | None                                                                   | None                                                          | WES (Reanalysis)     |                                            |
| <i>CTNGB1</i>           | IDSPG139  | Female | 12  | 7m           | None                             | None          | AD                            | Spastic tetraparesis    | None                   | None                                             | Learning disability       | Dystonia                | None                | Normal                                                                 | Strabismus, wheelchair                                        | WES                  |                                            |
| <i>CYP2U1</i>           | IDLNF40   | Male   | 10  | 1            | YES (brother)                    | YES           | AR (Homozygous)               | Spastic paraparesis     | None                   | None                                             | GDD + ID                  | Dystonia                | None                | Periventricular WM HI<br>WM, CC and HS atrophy                         | None                                                          | WES                  |                                            |
| <i>DDHD2</i>            | IDSPG61   | Female | 6   | 2            | None                             | YES           | AR (Homozygous)               | Spastic tetraplegia     | None                   | None                                             | GDD + ID                  | None                    | None                | Periventricular T2 WM HI, thin CC                                      | None                                                          | WES                  |                                            |
| <i>DLG4</i>             | IDSPG107  | Female | 16  | 1            | None                             | None          | AD                            | Spastic paraparesis     | None                   | None                                             | Language disorder         | None                    | Rolandic epilepsy   | Left hippocampal malrotation with dysmorphic and dilated temporal horn | None                                                          | WES (Reanalysis)     |                                            |
| <i>DSTYK / MMUT</i>     | IDLNF84   | Male   | 74  | 72           | None                             | YES           | AR (Homozygous/Homozygous)    | Pyramidal signs         | None                   | None                                             | Cognitive decline         | None                    | None                | Periventricular T2 WM HI                                               | Increased urine methylmalonic acid<br>Dysphagia<br>Osteopenia | WES                  |                                            |
| <i>ERBB4</i>            | IDSPG38   | Female | 54  | 40           | YES (mother)                     | None          | AD                            | Spastic paraparesis     | None                   | Distal hereditary motor neuropathy               | None                      | None                    | None                | Normal                                                                 | Chronic neurogen pattern in EMG study                         | WES (Reanalysis)     |                                            |
| <i>FA2H</i>             | IDSPG10   | Female | 27  | 4            | None                             | None          | AR (Homozygous)               | Spastic tetraparesis    | Ataxia                 | None                                             | Mild ID                   | Dystonia                | None                | Normal                                                                 | Wheelchair                                                    | WES                  |                                            |
| <i>FARS2</i>            | IDSPG116  | Male   | 9   | 1            | None                             | None          | AR (Compound Heterozygous)    | Spastic paraparesis     | Ataxia                 | None                                             | None                      | None                    | None                | Hypomyelination                                                        | None                                                          | WES                  |                                            |

| Gene                   | ID        | Sex    | Age | Age at onset | Affected relatives               | Consanguinity | Inheritance mode                | Pyramidal involvement   | Cerebellar involvement | Neuropathy                                       | Cognitive / Behaviour     | Extrapyramidal features   | Seizures                 | MRI findings                                                           | Other findings (exam or investigation tests)                                               | Diagnostic technique | Treatment                                                     |
|------------------------|-----------|--------|-----|--------------|----------------------------------|---------------|---------------------------------|-------------------------|------------------------|--------------------------------------------------|---------------------------|---------------------------|--------------------------|------------------------------------------------------------------------|--------------------------------------------------------------------------------------------|----------------------|---------------------------------------------------------------|
| <i>GFAP</i>            | IDSPG4    | Female | 61  | 20           | YES (three affected generations) | None          | AD                              | Spastic paraparesis     | Nystagmus              | None                                             | None                      | None                      | None                     | Mild signal change in brainstem                                        | Non alcoholic fatty liver disease                                                          | WES                  |                                                               |
| <i>IFIH1</i>           | IDSPG3    | Male   | 85  | 56           | YES (brother)                    | None          | AD                              | Pure spastic paraplegia | None                   | None                                             | None                      | None                      | None                     | Normal                                                                 | None                                                                                       | WES (Reanalysis)     |                                                               |
| <i>IFIH1</i>           | IDSPG60   | Female | 6   | 1            | None                             | None          | AD                              | Pure spastic paraplegia | None                   | None                                             | None                      | None                      | None                     | None                                                                   | None                                                                                       | WES (Reanalysis)     |                                                               |
| <i>IQSEC2</i>          | IDSPG127  | Male   | 11  | 0            | None                             | None          | X-Linked                        | Spastic paraparesis     | Ataxia                 | None                                             | ASD + Behavioral Disorder | None                      | None                     | None                                                                   | None                                                                                       | WES (Reanalysis)     |                                                               |
| <i>IRF2BPL</i>         | IDSPG44   | Male   | 12  | 0            | None                             | None          | AD                              | Spastic paraparesis     | None                   | None                                             | GDD + ID                  | None                      | None                     | Normal                                                                 | Tiptoe gait                                                                                | WES (Reanalysis)     |                                                               |
| <i>IRF2BPL</i>         | IDLNF58   | Male   | 16  | 5            | None                             | None          | AD                              | Spastic tetraplegia     | Ataxia                 | None                                             | GDD + regression          | Rigid akynetic syndrome   | None                     | Normal                                                                 | Vertical gaze palsy, hypomimia                                                             | WES (Reanalysis)     |                                                               |
| <i>KCNA1</i>           | IDLNF52   | Female | 8   | 0            | None                             | YES           | AR (Homozygous)                 | None                    | None                   | None                                             | GDD + severe ID           | Choreo-dystonic movements | Epileptic Encephalopathy | Normal                                                                 | EEG: Slow and disorganised background with occipital paroxysmal activity                   | WES (Reanalysis)     | Seizure control with a sodium channel blocker (oxcarbazepine) |
| <i>KIDINS220</i>       | IDSPG118  | Female | 10  | 4            | None                             | None          | AD                              | Pure spastic paraplegia | None                   | None                                             | None                      | None                      | None                     | Normal                                                                 | None                                                                                       | WES                  |                                                               |
| <i>KIF1A</i>           | IDSPG39   | Male   | 11  | 3            | None                             | None          | AD                              | Pure spastic paraplegia | None                   | None                                             | None                      | None                      | None                     | Normal                                                                 | Abnormal VEP                                                                               | WES                  |                                                               |
| <i>KIF1A</i>           | IDSPG110  | Female | 8   | 1            | YES (father)                     | None          | AD                              | Spastic paraparesis     | None                   | Axonal sensorimotor peripheral neuropathy        | None                      | None                      | None                     | Normal                                                                 | None                                                                                       | WES                  |                                                               |
| <i>KIF1A</i>           | IDSPG108  | Male   | 8   | 1            | None                             | None          | AD                              | Spastic paraparesis     | None                   | None                                             | ASD                       | None                      | None                     | Thin CC                                                                | None                                                                                       | WES                  |                                                               |
| <i>KIF5A</i>           | IDSPG17   | Male   | 28  | 21           | None                             | None          | AD                              | Spastic paraparesis     | None                   | Axonal sensorimotor peripheral neuropathy        | None                      | None                      | None                     | Normal                                                                 | Idiopathic interstitial tubular acidosis                                                   | WES                  |                                                               |
| <i>KMT2B</i>           | IDSPG114  | Male   | 19  | 3            | None                             | None          | AD                              | Spastic paraparesis     | None                   | None                                             | ADHD                      | Dystonia                  | None                     | Normal                                                                 | None                                                                                       | WES (Reanalysis)     |                                                               |
| <i>L2HGDH / CAPN10</i> | IDSPG47.1 | Female | 41  | 5            | YES (brother)                    | YES           | AR (Homozygous/homozygous)      | Spastic paraparesis     | None                   | None                                             | GDD + ID                  | None                      | Seizures                 | Frontal T2 WM HI                                                       | None                                                                                       | WES                  |                                                               |
| <i>LAMA1</i>           | IDSPG56   | Female | 10  | 1            | None                             | None          | AR (Compound Heterozygous)      | Hypotonia               | None                   | Distal hereditary motor neuropathy               | GDD + ID                  | None                      | Seizures                 | Subcortical hypomyelination, thin CC                                   | Abnormal VEP, nocturnal respiratory insufficiency                                          | WES (Reanalysis)     |                                                               |
| <i>LONP1</i>           | IDSPG166  | Female | 40  | 40           | YES (brother)                    | None          | AR (Compound Heterozygous)      | Spastic paraparesis     | Ataxia                 | None                                             | None                      | None                      | None                     | Normal                                                                 | Prion protein 14.3.3 Positive                                                              | WES                  |                                                               |
| <i>MORC2</i>           | IDSPG37   | Female | 48  | 11           | None                             | None          | AD                              | Pyramidal signs         | None                   | Axonal sensorimotor peripheral neuropathy        | None                      | None                      | None                     | Normal                                                                 | None                                                                                       | WES                  |                                                               |
| <i>NDUF56</i>          | IDSPG55   | Female | 67  | 10           | YES (sister)                     | None          | AR (Homozygous)                 | Spastic paraparesis     | None                   | Axonal sensorimotor peripheral neuropathy        | GDD                       | Tremor                    | Seizures                 | Lenticular nuclei HI                                                   | None                                                                                       | WES                  |                                                               |
| <i>PAX6</i>            | IDSPG155  | Male   | 51  | 0            | YES (son)                        | None          | AD                              | Pyramidal signs         | None                   | Axonal sensorimotor peripheral neuropathy        | ID                        | None                      | None                     | Normal                                                                 | Aniridia                                                                                   | WES                  |                                                               |
| <i>PCYT2</i>           | IDSPG27   | Male   | 60  | 19           | YES (sister)                     | YES           | AR (Homozygous)                 | Spastic paraparesis     | Ataxia                 | Distal hereditary motor neuropathy               | None                      | None                      | None                     | Normal                                                                 | None                                                                                       | WES (Reanalysis)     |                                                               |
| <i>PDK3</i>            | IDSPG172  | Male   | 50  | 13           | None                             | None          | X-Linked                        | Pyramidal signs         | None                   | Axonal sensorimotor peripheral neuropathy        | None                      | None                      | None                     | Normal                                                                 | None                                                                                       | WES                  |                                                               |
| <i>PI4KA</i>           | IDSPG16   | Male   | 43  | 17           | None                             | None          | AR (Compound Heterozygous)      | Spastic paraparesis     | None                   | None                                             | None                      | None                      | None                     | Arachnoid cyst of the posterior fossa and cervical spinal cord atrophy | Chron's disease                                                                            | WES (Reanalysis)     |                                                               |
| <i>PI4KA</i>           | IDSPG149  | Male   | 12  | 3            | None                             | None          | AR (Compound Heterozygous)      | Spastic paraparesis     | None                   | None                                             | Learning disability       | None                      | None                     | Normal                                                                 | None                                                                                       | WES (Reanalysis)     |                                                               |
| <i>PMM2</i>            | IDSPG123  | Male   | 13  | 0            | None                             | None          | AR (Compound Heterozygous)      | None                    | Ataxia                 | None                                             | GDD + ID                  | None                      | None                     | Hyperintensities in cerebellar cortex, cerebellar atrophy              | Oculomotor apraxia                                                                         | WES (Reanalysis)     |                                                               |
| <i>PNKP / AFG3L2</i>   | IDSPG42   | Female | 26  | 6            | None                             | None          | AR (Compound Heterozygous) / AD | None                    | Ataxia                 | Demyelinating sensorimotor peripheral neuropathy | Learning disability       | None                      | None                     | Normal                                                                 | Hand stereotyped behaviour guttural tics, obesity, hirsutism. Abnormal VEP, hypalbuminemia | WES (Reanalysis)     |                                                               |
| <i>PNPLA6</i>          | IDSPG13   | Male   | 36  | 32           | None                             | None          | AR (Compound Heterozygous)      | Pure spastic paraplegia | None                   | None                                             | None                      | None                      | None                     | Normal                                                                 | None                                                                                       | WES                  |                                                               |

| Gene            | ID       | Sex    | Age | Age at onset | Affected relatives               | Consanguinity | Inheritance mode           | Pyramidal involvement   | Cerebellar involvement | Neuropathy                                | Cognitive / Behaviour | Extrapyramidal features | Seizures  | MRI findings                                                                         | Other findings (exam or investigation tests)                              | Diagnostic technique | Treatment                                                               |
|-----------------|----------|--------|-----|--------------|----------------------------------|---------------|----------------------------|-------------------------|------------------------|-------------------------------------------|-----------------------|-------------------------|-----------|--------------------------------------------------------------------------------------|---------------------------------------------------------------------------|----------------------|-------------------------------------------------------------------------|
| <i>POLG</i>     | IDSPG113 | Male   | 39  | 30           | None                             | None          | AR (Compound Heterozygous) | Spastic paraparesis     | Ataxia                 | Distal hereditary motor neuropathy        | Learning disability   | None                    | None      | Periventricular T2 WM HI                                                             | None                                                                      | WES (Reanalysis)     | Q10 coenzyme                                                            |
| <i>POLR3A</i>   | IDSPG14  | Male   | 51  | 14           | None                             | None          | AR (Compound Heterozygous) | Spastic paraparesis     | Ataxia                 | None                                      | None                  | None                    | None      | Periventricular T2 WM HI                                                             | None                                                                      | WES (Re-analysis)    |                                                                         |
| <i>POLR3A</i>   | IDSPG28  | Male   | 76  | 28           | YES (brother)                    | None          | AR (Compound Heterozygous) | Pure spastic paraplegia | None                   | None                                      | None                  | None                    | None      | Cervical spinal cord atrophy                                                         | Wheelchair; abnormal SSEP                                                 | WES                  |                                                                         |
| <i>POLR3A</i>   | IDSPG109 | Male   | 8   | 1            | None                             | YES           | AR (Homozygous)            | Spastic paraparesis     | Ataxia                 | None                                      | Learning disability   | Bradikinesia, dystonia  | Myoclonus | Normal                                                                               | None                                                                      | WES (Reanalysis)     |                                                                         |
| <i>POLR3A</i>   | IDSPG122 | Male   | 35  | 22           | None                             | None          | AR (Compound Heterozygous) | Spastic paraparesis     | None                   | None                                      | None                  | Head, vocal tremor      | Seizures  | Normal                                                                               | None                                                                      | WES                  |                                                                         |
| <i>POLR3B</i>   | IDSPG66  | Male   | 13  | 7            | YES (mother)                     | None          | AD                         | Pure spastic paraplegia | None                   | None                                      | None                  | None                    | None      | None                                                                                 | None                                                                      | WES (Reanalysis)     |                                                                         |
| <i>REEP1</i>    | IDSPG12  | Male   | 80  | 22           | YES (three affected generations) | None          | AD                         | Spastic paraparesis     | Ataxia                 | None                                      | None                  | Tremor                  | None      | Normal                                                                               | None                                                                      | WES                  |                                                                         |
| <i>REEP1</i>    | IDSPG124 | Female | 14  | 1            | None                             | None          | AD                         | Spastic paraparesis     | None                   | Distal hereditary motor neuropathy        | None                  | None                    | None      | Normal                                                                               | Neonatal jaundice                                                         | WES                  |                                                                         |
| <i>RFC1</i>     | IDSPG173 | Female | 65  | 60           | None                             | YES           | AR                         | None                    | Ataxia                 | Axonal sensory neuropathy                 | None                  | None                    | None      | None                                                                                 | None                                                                      | RFC1 expansion       |                                                                         |
| <i>RFC1</i>     | IDSPG184 | Male   | 69  | 60           | None                             | None          | AR                         | None                    | Pure cerebellar Ataxia | None                                      | None                  | None                    | None      | None                                                                                 | None                                                                      | RFC1 expansion       |                                                                         |
| <i>RFC1</i>     | IDSPG192 | Female | 75  | 60           | None                             | None          | AR                         | None                    | Ataxia                 | Axonal sensory neuropathy                 | None                  | None                    | None      | None                                                                                 | Cough, abnormal Head impulse test                                         | RFC1 expansion       |                                                                         |
| <i>RFC1</i>     | IDSPG194 | Female | 63  | 55           | None                             | None          | AR                         | None                    | Ataxia                 | Axonal sensory neuropathy                 | None                  | None                    | None      | None                                                                                 | None                                                                      | RFC1 expansion       |                                                                         |
| <i>RFC1</i>     | IDSPG198 | Male   | 61  | 48           | None                             | None          | AR                         | None                    | Ataxia                 | Axonal sensory neuropathy                 | None                  | None                    | None      | None                                                                                 | None                                                                      | RFC1 expansion       |                                                                         |
| <i>RNASEH2B</i> | IDLNF141 | Male   | 9   | 1            | None                             | None          | AR (Homozygous)            | Spastic tetraplegia     | None                   | None                                      | GDD                   | None                    | None      | Multifocal subcortical hyperintensities, improvement (4y)                            | Abnormal VLCFA, onset after infection                                     | WES                  | JAK1 and JAK2 inhibitors<br>Monitoring of immunomediated manifestations |
| <i>SARSI</i>    | IDSPG64  | Female | 14  | 0            | None                             | None          | AD                         | Spastic paraparesis     | Ataxia                 | None                                      | GDD + ID              | None                    | Seizures  | Non progressive puntiform frontal subcortical HI                                     | Strabismus, abnormal VEP                                                  | WES (Reanalysis)     |                                                                         |
| <i>SEPSECS</i>  | IDLNF67  | Male   | 11  | 1            | YES (brother)                    | YES           | AR (Homozygous)            | Spastic tetraplegia     | Ataxia                 | None                                      | GDD                   | None                    | None      | Cerebellar and bilateral thalamic atrophy                                            | Abnormal VEP                                                              | WES                  |                                                                         |
| <i>SEPSECS</i>  | IDLNF121 | Male   | 5   | 1            | None                             | None          | AR (Homozygous)            | Spastic paraparesis     | Nystagmus              | None                                      | GDD + ID              | Tremor                  | None      | Periventricular T2 WM HI<br>Cerebellar atrophy                                       | None                                                                      | WES                  |                                                                         |
| <i>SHMT2</i>    | IDSPG26  | Male   | 24  | 1            | YES (brother)                    | None          | AR (Homozygous)            | Spastic paraparesis     | Ataxia                 | None                                      | GDD + ID              | None                    | None      | Hypoplastic CC, perisylvian polymicrogyria-like pattern                              | Dysmorphic features, congenital microcephaly, hypertrophic cardiomyopathy | WES (Reanalysis)     |                                                                         |
| <i>SLC25A46</i> | IDSPG93  | Male   | 49  | 25           | None                             | None          | AR (Homozygous)            | Pyramidal signs         | Ataxia                 | Axonal sensorimotor peripheral neuropathy | None                  | None                    | None      | Occipitoparietal bilateral atrophy, superior cerebellar atrophy, mega cisterna magna | Bilateral optic atrophy, hypoaacusia, mild dysmorphic features            | WES                  |                                                                         |
| <i>SLC35B2</i>  | IDLNF68  | Female | 8   | 0            | None                             | None          | AR (Homozygous)            | Spastic tetraplegia     | Nystagmus              | None                                      | GDD + ID              | Dystonia                | None      | Severe hypomielination                                                               | None                                                                      | WES (Reanalysis)     |                                                                         |
| <i>SPAST</i>    | IDSPG9   | Female | 89  | 45           | YES (three affected generations) | None          | AD                         | Spastic paraparesis     | Nystagmus              | None                                      | None                  | None                    | None      | Normal                                                                               | Wheelchair                                                                | WES                  |                                                                         |
| <i>SPAST</i>    | IDSPG73  | Male   | 20  | 3            | None                             | None          | AD                         | Spastic paraparesis     | Nystagmus              | None                                      | Language disorder     | None                    | None      | Myelination delay                                                                    | None                                                                      | WES                  |                                                                         |
| <i>SPAST</i>    | IDSPG132 | Female | 36  | 30           | YES (father)                     | None          | AD                         | Pure spastic paraplegia | None                   | None                                      | None                  | None                    | None      | None                                                                                 | None                                                                      | CNV                  |                                                                         |
| <i>SPAST</i>    | IDSPG160 | Male   | 64  | 49           | YES (mother)                     | None          | AD                         | Pure spastic paraplegia | None                   | None                                      | None                  | None                    | None      | Normal                                                                               | None                                                                      | WES                  |                                                                         |
| <i>SPG11</i>    | IDSPG20  | Female | 32  | 28           | None                             | None          | AR (Compound Heterozygous) | Spastic paraparesis     | None                   | None                                      | None                  | None                    | None      | Periventricular T2 WM HI                                                             | Congenital hip luxation, psoriasis.                                       | WES                  |                                                                         |
| <i>SPG11</i>    | IDSPG24  | Male   | 19  | 18           | None                             | None          | AR (Compound Heterozygous) | Spastic paraparesis     | None                   | None                                      | ID                    | None                    | None      | Periventricular T2 WM HI                                                             | None                                                                      | WES                  |                                                                         |
| <i>SPG11</i>    | IDSPG40  | Female | 25  | 15           | None                             | None          | AR (Compound Heterozygous) | Spastic paraparesis     | None                   | Peripheral neuropathy                     | None                  | None                    | None      | Periventricular T2 WM HI                                                             | None                                                                      | WES                  |                                                                         |

| Gene           | ID       | Sex    | Age | Age at onset | Affected relatives | Consanguinity | Inheritance mode           | Pyramidal involvement   | Cerebellar involvement | Neuropathy                                | Cognitive / Behaviour    | Extrapyramidal features | Seizures | MRI findings                                                                 | Other findings (exam or investigation tests) | Diagnostic technique | Treatment                                                    |
|----------------|----------|--------|-----|--------------|--------------------|---------------|----------------------------|-------------------------|------------------------|-------------------------------------------|--------------------------|-------------------------|----------|------------------------------------------------------------------------------|----------------------------------------------|----------------------|--------------------------------------------------------------|
| <i>SPG11</i>   | IDSPG48  | Male   | 21  | 2            | None               | None          | AR                         | Spastic paraparesis     | None                   | Optic neuropathy                          | GDD + attention disorder | None                    | None     | Peritrial T2 WM HI, mild atrophy, thin CC                                    | None                                         | WES                  |                                                              |
| <i>SPG11</i>   | IDSPG99  | Male   | 41  | 31           | None               | None          | AR (Homozygous)            | Pure spastic paraplegia | None                   | None                                      | None                     | None                    | None     | Normal                                                                       | None                                         | WES                  |                                                              |
| <i>SPG7</i>    | IDSPG21  | Male   | 51  | 37           | None               | None          | AR (Compound Heterozygous) | Spastic paraparesis     | Ataxia                 | None                                      | None                     | None                    | None     | Olivopontocerebellar degeneration                                            | Bilateral ptosis, ophthalmoparesia           | WGS                  |                                                              |
| <i>SPG7</i>    | IDSPG23  | Female | 60  | 50           | YES (sister)       | YES           | AR (Homozygous)            | Pure spastic paraplegia | None                   | None                                      | None                     | None                    | None     | Cervical spinal cord atrophy                                                 | None                                         | WES                  |                                                              |
| <i>SPG7</i>    | IDSPG30  | Male   | 53  | 35           | YES (two siblings) | YES           | AR (Homozygous)            | Spastic paraparesis     | Ataxia                 | None                                      | None                     | None                    | None     | Cerebellar atrophy                                                           | Ptosis                                       | WES                  |                                                              |
| <i>SPG7</i>    | IDSPG33  | Female | 64  | 40           | YES (grandmother)  | YES           | AR (Homozygous)            | Pure spastic paraplegia | None                   | None                                      | None                     | None                    | None     | Normal                                                                       | None                                         | WES                  |                                                              |
| <i>SPTAN1</i>  | IDSPG134 | Male   | 20  | 7            | None               | None          | AD                         | Pure spastic paraplegia | None                   | None                                      | None                     | None                    | None     | Normal                                                                       | D8 - D10 syringomyelia                       | WGS                  |                                                              |
| <i>SPTBN2</i>  | IDSPG125 | Male   | 38  | 30           | None               | None          | AD                         | None                    | Ataxia                 | None                                      | Executive dysfunction    | Dystonia                | None     | Cerebellar atrophy                                                           | None                                         | WGS                  |                                                              |
| <i>SVBP</i>    | IDSPG8   | Male   | 69  | 16           | YES (brother)      | None          | AR (Homozygous)            | Spastic paraparesis     | None                   | None                                      | ID                       | None                    | None     | Normal                                                                       | None                                         | WES (Reanalysis)     |                                                              |
| <i>SVBP</i>    | IDSPG46  | Female | 37  | 30           | YES (sister)       | None          | AR (Homozygous)            | None                    | None                   | Axonal sensorimotor peripheral neuropathy | None                     | None                    | None     | Dilation of the ventricles and cortical sulci, greater than expected         | None                                         | WES (Reanalysis)     |                                                              |
| <i>TAF1</i>    | IDSPG71  | Male   | 7   | 0            | None               | None          | X-Linked                   | Spastic paraparesis     | None                   | None                                      | GDD                      | None                    | None     | Dysplastic CC, hydrocephalus secondary to aqueductal stenosis, colpocephalia | High lactate and ammonium in CSF             | WES (Reanalysis)     |                                                              |
| <i>TMEM240</i> | IDSPG92  | Male   | 47  | 3            | None               | YES           | AD                         | None                    | Ataxia                 | None                                      | OCD                      | Tremor                  | None     | Cerebellar atrophy, specially superior foliae, brainstem atrophy             | None                                         | WES                  |                                                              |
| <i>TRMT5</i>   | IDSPG120 | Male   | 16  | 0            | None               | None          | AR (Compound Heterozygous) | Spastic paraparesis     | None                   | Distal hereditary motor neuropathy        | ID                       | None                    | None     | Cerebellar atrophy                                                           | Abnormal SSEP                                | WES                  | Coenzyme Q10, thiamine, monitoring of cardiac manifestations |
| <i>UBAPI</i>   | IDSPG76  | Female | 14  | 7            | YES (Mother)       | None          | AD                         | Spastic paraparesis     | None                   | None                                      | ADHD                     | None                    | None     | Normal                                                                       | None                                         | WES (Reanalysis)     |                                                              |

AD Autosomal Dominant  
ADHD Attention Deficit and hyperactivity disorder  
AR Autosomal Recessive  
ASD Autism Spectrum Disease  
BCAA Branched-Chain Amino Acids  
BG Basal ganglia  
CC Corpus callosum  
CSF Cerebrospinal fluid  
EEG Electroencephalogram  
EMG Electromyogram  
FDG-PET/CT Fluorodesoxyglucose Positron Emission Tomography / Computerised tomography  
GDD Global Developmental Delay  
HI Hyperintensity  
ID Intellectual Disability  
OCD Obsessive-Compulsive Disorder  
SSEP Somatosensory-evoked potential  
VEP Visual-evoked potential  
WM White matter

**Table S2. Clinical table.** Clinical manifestations, main complementary exams and genes identified in diagnosed cases. Cases in which, after retrospective review, we considered that the clinical diagnosis was possible.

**Table S3**

| Gene             | Variant                                              | Patient  | Sex | Age | Age of onset | Family History                            | Main Phenotypical Features                                                                                                                                                      | Inheritance                | ACMG Classification | Comments                                                                                                                                                                                                                                                                                                      |
|------------------|------------------------------------------------------|----------|-----|-----|--------------|-------------------------------------------|---------------------------------------------------------------------------------------------------------------------------------------------------------------------------------|----------------------------|---------------------|---------------------------------------------------------------------------------------------------------------------------------------------------------------------------------------------------------------------------------------------------------------------------------------------------------------|
| <i>ACER3</i>     | NP_060837.3:p.(Gly211Cys)                            | IDSPG75  | M   | 16  | 1            | YES<br>(affected cousin)<br>consanguinity | Pure spastic paraparesis, early onset. Normal MRI                                                                                                                               | AR (Homozygous)            | PATH                | ACER3 causes an early childhood-onset progressive leukodystrophy, patients are severely impaired, needing mechanical ventilation and feeding tube. Milder phenotype with slowly progressive pure spastic paraplegia without white matter involvement.                                                         |
| <i>COL6A3</i>    | NP_004360.2:p.(Lys2483Glu)                           | IDSPG161 | F   | 56  | 3            | NO                                        | Pyramidal signs. Distal hereditary motor neuropathy                                                                                                                             | AR (Homozygous)            | PATH                | Atypical form with predominantly distal involvement and the neurophysiological patterns of neurogenic origin.                                                                                                                                                                                                 |
| <i>GFAP</i>      | NP_001124491.1:p.(Gly18Val)                          | IDSPG4   | F   | 61  | 20           | YES<br>(three generations)                | Spastic paraparesis, nystagmus. MRI showed mild signal change in brainstem                                                                                                      | AD                         | PATH                | This variant, functionally validated in an astrocytoma cell line, might cause variable expressivity and an attenuated phenotype, probably associated with alternative pathogenic mechanisms [24].                                                                                                             |
| <i>KCNA1</i>     | NP_000208.2:p.(Val368Leu)                            | IDLNF52  | F   | 8   | 0            | Consanguinity                             | Early onset epileptic encephalopathy, dyskinesias, global developmental delay with intellectual disability                                                                      | AR (Homozygous)            | PATH                | New inheritance mode with a more severe phenotype. Over 50 families affected by the episodic ataxia type 1 disease spectrum have been described [45].                                                                                                                                                         |
| <i>KIDINS220</i> | NM_020738.3:c.4054-1G>C                              | IDSPG118 | F   | 10  | 4            | NO                                        | Spastic paraparesis. Motor delay, autonomous ambulation at 4.5 years. Cognitive level preserved                                                                                 | AD                         | LP                  | Previously reported: SINO syndrome (spastic paraplegia with intellectual disability, nystagmus, and obesity). Additional features besides spastic paraplegia were not present in this patient.                                                                                                                |
| <i>LONP1</i>     | NM_004793.3:c.2154+1G>C<br>NP_004784.2:p.(Leu306Trp) | IDSPG166 | F   | 39  | 2            | YES<br>(affected brother)                 | Child onset cerebellar ataxia with pyramidal involvement, slowly progressive. MRI: Cerebellar atrophy and dilated 4th ventricle                                                 | AR (Compound Heterozygous) | LP/PATH             | Previously reported: CODAS syndrome (Cerebral, Ocular, Dental, Auricular, and Skeletal Anomalies). New phenotype, exhibiting only cerebellar ataxia.                                                                                                                                                          |
| <i>NDUFS6</i>    | NM_004553.4:c.309+5G>A                               | IDSPG55  | F   | 67  | 10           | YES<br>(affected sister)<br>consanguinity | Spastic paraparesis, axonal sensorimotor peripheral neuropathy, hypoacusia, keratoconus, cataracts, tremor, seizures, vocal cord palsy. MRI: lenticular nuclei hyperintensities | AR (Homozygous)            | PATH                | Most of patients present with severe neonatal lactic acidemia and complex I deficiency leading to death in the first days of life. Third described case with the same variant, mildest phenotype, first one reaching adult life.                                                                              |
| <i>PDK3</i>      | NP_001135858.1:p.(Arg158His)                         | IDSPG172 | M   | 50  | 13           | NO                                        | Spastic paraparesis with congenital severe axonal sensorimotor peripheral neuropathy                                                                                            | X-Linked                   | PATH                | Pyramidal signs not described previously                                                                                                                                                                                                                                                                      |
| <i>PMM2</i>      | NP_000294.1:p.(Arg141His)<br>NM_000303.2:c.640-23A>G | IDSPG123 | M   | 13  | 0            | NO                                        | Non-progressive congenital ataxia with oculomotor apraxia, hypotonia; neurodevelopmental delay with intellectual disability                                                     | AR (Compound Heterozygous) | PATH/PATH           | Pure neurologic and mild phenotype without enteropathy, coagulopathy and hepatopathy; furthermore, sialotransferrin profile is normal.                                                                                                                                                                        |
| <i>SARS1</i>     | NM_006513.4:c.969+1_969+3del                         | IDSPG64  | M   | 9   | 0            | NO                                        | Spastic paraparesis with ataxia, global developmental delay, intellectual disability and febrile seizures                                                                       | AD                         | PATH                | New inheritance mode ( <i>de novo</i> dominant) with a novel complex spastic paraplegia phenotype. This clinical phenotype was reported in a previous publication [46].                                                                                                                                       |
| <i>SPTAN1</i>    | NP_001123910.1:p.(Arg19Trp)                          | IDSPG134 | M   | 18  | 7            | NO                                        | Pure spastic paraparesis, pediatric onset, pace of progression. Normal MRI                                                                                                      | AD                         | LP                  | Pure HSP related with biallelic SPTAN1 variants have been described; SPTAN1 heterozygous mutations may cause EIEE5 and distal axonal motor neuropathy with pyramidal involvement. WGS ruled out a second variant, consistent with a pure HSP phenotype associated with a <i>de novo</i> heterozygous variant. |

M = male; F = female; EIEE5 early infantile epileptic encephalopathy-5; HSP = hereditary spastic paraplegia; LP = Likely pathogenic

**Table S3. Atypical cases.** Patients with new phenotypes, atypical forms of presentation and blended phenotypes in families with more than one gene associated with the phenotype.

**Table S4**

| ID       | Genes        | Inheritance  | Chr | Start base | End base | Type     | Nomenclature                | CNV validation                                                                                                                                                                                                                                                                                                                                                                                                                       |
|----------|--------------|--------------|-----|------------|----------|----------|-----------------------------|--------------------------------------------------------------------------------------------------------------------------------------------------------------------------------------------------------------------------------------------------------------------------------------------------------------------------------------------------------------------------------------------------------------------------------------|
| IDSPG116 | <i>FARS2</i> | Heterozygous | 6   | 5172693    | 5459957  | deletion | 6p25.1(5172693-5459957)x1   | Q-PCR was carried out to measure the relative copy number of the chromosome 6: 5172693-5459957. Expression level of human <i>LYRM4</i> (exon 2-exon 2) and <i>FARS2</i> gene (intron 1-intron 1 and exon 3-exon 3) were compared to the human <i>CDLY</i> (exon 4-exon 4) or <i>NRN1</i> (exon 2-exon 2) genes. IDSPG116 and father exhibit only one copy of the <i>FARS2</i> gene compared to the mother and 8 healthy individuals. |
| IDSPG132 | <i>SPAST</i> | Heterozygous | 2   | 32337285   | 32350543 | deletion | 2p22.3(32337285-32350543)x1 | Q-PCR was carried out to measure the relative copy number of the human <i>SPAST</i> gene (exon 5-exon 5, exon 7-exon 7, and intron 7-intron 7) compared to the human <i>MEMO1</i> (exon 2-exon 2) or <i>NLRC4</i> (exon 4-exon 4) genes. IDSPG132 and father exhibit only one copy of the <i>SPAST</i> gene compared to the mother and 8 healthy individuals.                                                                        |

**Table S4. CNV cases. Validation of CNV variants from WGS.**





| Gene      | ID        | Inheritance                | Type                         | Genomic GRCh37 description          | Transcript description     | Protein description               | Chr | VCF Genomic | Reference | Alternative | P1 | P2 | P3 | P4 | P5 | P6 | P7 | P8 | P9 | P10 | P11 | P12 | P13 | P14 | P15 | CONCLUSION        | ClinVar accession numbers |
|-----------|-----------|----------------------------|------------------------------|-------------------------------------|----------------------------|-----------------------------------|-----|-------------|-----------|-------------|----|----|----|----|----|----|----|----|----|-----|-----|-----|-----|-----|-----|-------------------|---------------------------|
| IRF2BPL   | IDSPG44   | AD                         | stopgain                     | NC_000014.8:g.77493574G>A           | NM_024496.3:c.562C>T       | NP_078772.1.p.(Arg188Ter)         | 14  | 77493574    | G         | A           | N  | N  | N  | N  | N  | N  | N  | N  | N  | N   | N   | N   | N   | N   | N   | PATHOGENIC        | SCV003920768              |
| KCNA1     | IDLNF52   | AR (Homozygous)            | nonsynonymous SNV            | NC_000012.11:g.5021646G>C           | NM_000217.2:c.1102G>C      | NP_000208.2.p.(Val368Leu)         | 12  | 5021646     | G         | C           | N  | N  | N  | N  | N  | N  | N  | N  | N  | N   | N   | N   | N   | N   | N   | PATHOGENIC        | SCV003920769              |
| KIDINS220 | IDSPG118  | AD                         | splicing                     | NC_000002.11:g.8872113C>G           | NM_020738.3:c.40541G>C     | NP_065789.1.p.?                   | 2   | 8872113     | C         | G           | N  | N  | N  | N  | N  | N  | N  | N  | N  | N   | N   | N   | N   | N   | N   | LIKELY PATHOGENIC | SCV003920770              |
| KIF1A     | IDSPG108  | AD                         | nonsynonymous SNV            | NC_000002.11:g.241722504G>A         | NM_004321.7:c.821C>T       | NP_004312.2.p.(Ser274Leu)         | 2   | 241722504   | G         | A           | N  | N  | N  | N  | N  | N  | N  | N  | N  | N   | N   | N   | N   | N   | N   | PATHOGENIC        | SCV003920771              |
| KIF1A     | IDSPG110  | AD                         | nonsynonymous SNV            | NC_000002.11:g.241723181G>A         | NM_004321.7:c.773C>T       | NP_004312.2.p.(Thr258Met)         | 2   | 241723181   | G         | A           | N  | N  | N  | N  | N  | N  | N  | N  | N  | N   | N   | N   | N   | N   | N   | LIKELY PATHOGENIC | SCV003920772              |
| KIF1A     | IDSPG39   | AD                         | nonsynonymous SNV            | NC_000002.11:g.241723193C>T         | NM_004321.7:c.761G>A       | NP_004312.2.p.(Arg254Gln)         | 2   | 241723193   | C         | T           | N  | N  | N  | N  | N  | N  | N  | N  | N  | N   | N   | N   | N   | N   | N   | PATHOGENIC        | SCV003920773              |
| KIF5A     | IDSPG17   | AD                         | nonsynonymous SNV            | NC_000012.11:g.57962768G>T          | NM_004984.2:c.737G>T       | NP_004975.2.p.(Gly246Val)         | 12  | 57962768    | G         | T           | N  | N  | N  | N  | N  | N  | N  | N  | N  | N   | N   | N   | N   | N   | N   | PATHOGENIC        | SCV003920774              |
| KMT2B     | IDSPG114  | AD                         | nonsynonymous SNV            | NC_000019.9:g.36221345G>T           | NM_014727.2:c.5179G>T      | NP_055542.1.p.(Ala172Ser)         | 19  | 36221345    | G         | T           | N  | N  | N  | N  | N  | N  | N  | N  | N  | N   | N   | N   | N   | N   | N   | LIKELY PATHOGENIC | SCV003920775              |
| L2HGDH    | IDSPG47.1 | AR (Homozygous)            | nonsynonymous SNV            | NC_000014.8:g.50750660C>A           | NM_024884.2:c.632G>T       | NP_079160.1.p.(Gly211Val)         | 14  | 50750660    | C         | A           | N  | N  | N  | N  | N  | N  | N  | N  | N  | N   | N   | N   | N   | N   | N   | VUS               | SCV003920777              |
| LAMA1     | IDSPG56   | AR (Compound Heterozygous) | frameshift insertion         | NC_000018.9:g.6948418_6948422dup    | NM_005559.3:c.8691_8695dup | NP_005550.2.p.(Gly2899GlnfsTer18) | 18  | 6948416     | C         | CCGCTT      | N  | N  | N  | N  | N  | N  | N  | N  | N  | N   | N   | N   | N   | N   | N   | PATHOGENIC        | SCV003920778              |
| LAMA1     | IDSPG56   | AR (Compound Heterozygous) | non-canonical splicing       | NC_000018.9:g.7038961G>C            | NM_005559.3:c.1423-12C>G   | NP_005550.2.p.?                   | 18  | 7038961     | G         | C           | N  | N  | N  | N  | N  | N  | N  | N  | N  | N   | N   | N   | N   | N   | N   | PATHOGENIC        | SCV003920779              |
| LONP1     | IDSPG166  | AR (Compound Heterozygous) | splicing                     | NC_000019.9:g.5694771C>G            | NM_004793.3:c.2154+1G>C    | NP_004784.2.p.?                   | 19  | 5694771     | C         | G           | N  | N  | N  | N  | N  | N  | N  | N  | N  | N   | N   | N   | N   | N   | N   | PATHOGENIC        | SCV003920780              |
| LONP1     | IDSPG166  | AR (Compound Heterozygous) | nonsynonymous SNV            | NC_000019.9:g.5708368A>C            | NM_004793.3:c.917T>G       | NP_004784.2.p.(Leu306Trp)         | 19  | 5708368     | A         | C           | N  | N  | N  | N  | N  | N  | N  | N  | N  | N   | N   | N   | N   | N   | N   | LIKELY PATHOGENIC | SCV003920781              |
| MMUT      | IDLNF84   | AR (Homozygous)            | nonsynonymous SNV            | NC_000006.11:g.49425727G>A          | NM_000255.3:c.430C>T       | NP_000246.2.p.(Arg144Cys)         | 6   | 49425727    | G         | A           | N  | N  | N  | N  | N  | N  | N  | N  | N  | N   | N   | N   | N   | N   | N   | PATHOGENIC        | SCV003920782              |
| MORC2     | IDSPG37   | AD                         | nonsynonymous SNV            | NC_000022.10:g.31337490G>A          | NM_014941.1:c.568C>T       | NP_055756.1.p.(Arg190Trp)         | 22  | 31337490    | G         | A           | N  | N  | N  | N  | N  | N  | N  | N  | N  | N   | N   | N   | N   | N   | N   | PATHOGENIC        | SCV003920783              |
| NDUF56    | IDSPG55   | AR (Homozygous)            | splicing                     | NC_000005.9:g.1814580G>A            | NM_004553.3:c.309+5G>A     | NP_004544.1.p.?                   | 5   | 1814580     | G         | A           | N  | N  | N  | N  | N  | N  | N  | N  | N  | N   | N   | N   | N   | N   | N   | PATHOGENIC        | SCV003920784              |
| PAX6      | IDSPG155  | AD                         | stopgain                     | NC_000011.9:g.31815335G>A           | NM_001310160.1:c.373C>T    | NP_001297089.1.p.(Arg125Ter)      | 11  | 31815335    | G         | A           | N  | N  | N  | N  | N  | N  | N  | N  | N  | N   | N   | N   | N   | N   | N   | PATHOGENIC        | SCV003920785              |
| PCYT2     | IDSPG27   | AR (Homozygous)            | nonsynonymous SNV + splicing | NC_000017.10:g.79863546C>G          | NM_001184917.2:c.957G>C    | NP_001171846.1.p.(Lys319Asn)      | 17  | 79863546    | C         | G           | N  | N  | N  | N  | N  | N  | N  | N  | N  | N   | N   | N   | N   | N   | N   | LIKELY PATHOGENIC | SCV003920786              |
| PDK3      | IDSPG172  | X-Linked                   | nonsynonymous SNV            | NC_000023.10:g.24521596G>A          | NM_001142386.2:c.473G>A    | NP_001135858.1.p.(Arg158His)      | X   | 24521596    | G         | A           | N  | N  | N  | N  | N  | N  | N  | N  | N  | N   | N   | N   | N   | N   | N   | PATHOGENIC        | SCV003920788              |
| PI4KA     | IDSPG149  | AR (Compound Heterozygous) | nonsynonymous SNV            | NC_000022.10:g.21083617C>T          | NM_058004.3:c.4666G>A      | NP_477352.3.p.(Val1156Met)        | 22  | 21083617    | C         | T           | N  | N  | N  | N  | N  | N  | N  | N  | N  | N   | N   | N   | N   | N   | N   | PATHOGENIC        | SCV003920789              |
| PI4KA     | IDSPG149  | AR (Compound Heterozygous) | nonsynonymous SNV            | NC_000022.10:g.21073068G>A          | NM_058004.3:c.5159C>T      | NP_477352.3.p.(Thr1720Ile)        | 22  | 21073068    | G         | A           | N  | N  | N  | N  | N  | N  | N  | N  | N  | N   | N   | N   | N   | N   | N   | PATHOGENIC        | SCV003920790              |
| PI4KA     | IDSPG16   | AR (Compound Heterozygous) | frameshift deletion          | NC_000022.10:g.21064212_21064215del | NM_058004.3:c.6156_6159del | NP_477352.3.p.(Thr2053SerfsTer4)  | 22  | 21064209    | TTGTC     | T           | N  | N  | N  | N  | N  | N  | N  | N  | N  | N   | N   | N   | N   | N   | N   | PATHOGENIC        | SCV003920791              |
| PI4KA     | IDSPG16   | AR (Compound Heterozygous) | frameshift deletion          | NC_000022.10:g.21068749_21068751del | NM_058004.3:c.5459_5461del | NP_477352.3.p.(Glu1820del)        | 22  | 21068745    | CCTT      | C           | N  | N  | N  | N  | N  | N  | N  | N  | N  | N   | N   | N   | N   | N   | N   | PATHOGENIC        | SCV003920792              |
| PMM2      | IDSPG123  | AR (Compound Heterozygous) | nonsynonymous SNV            | NC_000016.9:g.8905010G>A            | NM_000303.2:c.422G>A       | NP_000294.1.p.(Arg141His)         | 16  | 8905010     | G         | A           | N  | N  | N  | N  | N  | N  | N  | N  | N  | N   | N   | N   | N   | N   | N   | PATHOGENIC        | SCV003920793              |
| PMM2      | IDSPG123  | AR (Compound Heterozygous) | non-canonical splicing       | NC_000016.9:g.8941558A>G            | NM_000303.2:c.640-23A>G    | NP_000294.1.p.?                   | 16  | 8941558     | A         | G           | N  | N  | N  | N  | N  | N  | N  | N  | N  | N   | N   | N   | N   | N   | N   | PATHOGENIC        | SCV003920794              |
| PNKP      | IDSPG42   | AR (Compound Heterozygous) | nonsynonymous SNV            | NC_000019.9:g.50365360C>T           | NM_007254.3:c.1129G>A      | NP_009185.2.p.(Gly377Arg)         | 19  | 50365360    | C         | T           | N  | N  | N  | N  | N  | N  | N  | N  | N  | N   | N   | N   | N   | N   | N   | LIKELY PATHOGENIC | SCV003920795              |
| PNKP      | IDSPG42   | AR (Compound Heterozygous) | nonsynonymous SNV            | NC_000019.9:g.50365445C>A           | NM_007254.3:c.1123G>T      | NP_009185.2.p.(Gly375Trp)         | 19  | 50365445    | C         | A           | N  | N  | N  | N  | N  | N  | N  | N  | N  | N   | N   | N   | N   | N   | N   | PATHOGENIC        | SCV003920796              |
| PNPLA6    | IDSPG13   | AR (Compound Heterozygous) | splicing                     | NC_000019.9:g.7605514A>C            | NM_006702.4:c.598-2A>C     | NP_006693.3.p.?                   | 19  | 7605514     | A         | C           | N  | N  | N  | N  | N  | N  | N  | N  | N  | N   | N   | N   | N   | N   | N   | PATHOGENIC        | SCV003920797              |
| PNPLA6    | IDSPG13   | AR (Compound Heterozygous) | nonsynonymous SNV            | NC_000019.9:g.7623750A>T            | NM_001166114.1:c.3412A>T   | NP_001159586.1.p.(Ser1138Cys)     | 19  | 7623750     | A         | T           | N  | N  | N  | N  | N  | N  | N  | N  | N  | N   | N   | N   | N   | N   | N   | LIKELY PATHOGENIC | SCV003920799              |
| POLG      | IDSPG113  | AR (Compound Heterozygous) | nonsynonymous SNV            | NC_000015.9:g.89872286A>C           | NM_002693.2:c.911T>G       | NP_002684.1.p.(Leu304Arg)         | 15  | 89872286    | A         | C           | N  | N  | N  | N  | N  | N  | N  | N  | N  | N   | N   | N   | N   | N   | N   | PATHOGENIC        | SCV003920800              |
| POLG      | IDSPG113  | AR (Compound Heterozygous) | non-canonical splicing       | NC_000015.9:g.89866197G>A           | NM_002693.2:c.2266-64C>T   | NP_002684.1.p.?                   | 15  | 89866197    | G         | A           | N  | N  | N  | N  | N  | N  | N  | N  | N  | N   | N   | N   | N   | N   | N   | VUS               | SCV003920801              |
| POLR3A    | IDLNF56   | AR (Compound Heterozygous) | nonsynonymous SNV            | NC_000010.10:g.7976450C>T           | NM_007055.3:c.2171G>A      | NP_008986.2.p.(Cys724Tyr)         | 10  | 79764550    | C         | T           | N  | N  | N  | N  | N  | N  | N  | N  | N  | N   | N   | N   | N   | N   | N   | PATHOGENIC        | SCV003920802              |
| POLR3A    | IDLNF56   | AR (Compound Heterozygous) | nonsynonymous SNV            | NC_000010.10:g.79764608G>C          | NM_007055.3:c.2113C>G      | NP_008986.2.p.(Pro705Ala)         | 10  | 79764608    | G         | C           | N  | N  | N  | N  | N  | N  | N  | N  | N  | N   | N   | N   | N   | N   | N   | LIKELY PATHOGENIC | SCV003920803              |
| POLR3A    | IDSPG109  | AR (Homozygous)            | non-canonical splicing       | NC_000010.10:g.79769440G>C          | NM_007055.3:c.1771-7C>G    | NP_008986.2.p.?                   | 10  | 79769440    | G         | C           | N  | N  | N  | N  | N  | N  | N  | N  | N  | N   | N   | N   | N   | N   | N   | PATHOGENIC        | SCV003920804              |
| POLR3A    | IDSPG122  | AR (Compound Heterozygous) | nonsynonymous SNV            | NC_000010.10:g.79741203C>T          | NM_007055.3:c.3874G>A      | NP_008986.2.p.(Asp1292Asn)        | 10  | 79741203    | C         | T           | N  | N  | N  | N  | N  | N  | N  | N  | N  | N   | N   | N   | N   | N   | N   | LIKELY PATHOGENIC | SCV003920805              |
| POLR3A    | IDSPG122  | AR (Compound Heterozygous) | non-canonical splicing       | NC_000010.10:g.79769273C>T          | NM_007055.3:c.1909+22G>A   | NP_008986.2.p.?                   | 10  | 79769273    | C         | T           | N  | N  | N  | N  | N  | N  | N  | N  | N  | N   | N   | N   | N   | N   | N   | PATHOGENIC        | SCV003920806              |

| Gene     | ID       | Inheritance                | Type                   | Genomic GRCh37 description            | Transcript description       | Protein description                | Chr | VCF Genomic | Reference   | Alternative | P1 | P2 | P3 | P4 | P5 | P6 | P7 | P8 | P9 | P10 | P11 | P12 | P13 | P14 | P15        | CONCLUSION        | ClinVar accession numbers |
|----------|----------|----------------------------|------------------------|---------------------------------------|------------------------------|------------------------------------|-----|-------------|-------------|-------------|----|----|----|----|----|----|----|----|----|-----|-----|-----|-----|-----|------------|-------------------|---------------------------|
| POLR3A   | IDSPG14  | AR (Compound Heterozygous) | non-canonical splicing | NC_000010.10:g.79769273C>T            | NM_007055.3:c.1909+22G>A     | NP_008986.2.p.?                    | 10  | 79769273    | C           | T           | Y  | N  | N  | Y  | N  | N  | N  | N  | N  | N   | Y   | N   | N   | Y   | Y          | PATHOGENIC        | SCV003920806              |
| POLR3A   | IDSPG14  | AR (Compound Heterozygous) | nonsynonymous SNV      | NC_000010.10:g.79785447C>T            | NM_007055.3:c.251G>A         | NP_008986.2.p.(Gly84Glu)           | 10  | 79785447    | C           | T           | N  | N  | N  | N  | Y  | N  | N  | N  | N  | N   | Y   | Y   | Y   | Y   | Y          | LIKELY PATHOGENIC | SCV003920807              |
| POLR3A   | IDSPG28  | AR (Compound Heterozygous) | non-canonical splicing | NC_000010.10:g.79769273C>T            | NM_007055.3:c.1909+22G>A     | NP_008986.2.p.?                    | 10  | 79769273    | C           | T           | Y  | N  | N  | Y  | N  | N  | N  | N  | N  | N   | Y   | N   | N   | Y   | Y          | PATHOGENIC        | SCV003920806              |
| POLR3A   | IDSPG28  | AR (Compound Heterozygous) | nonsynonymous SNV      | NC_000010.10:g.79769342C>T            | NM_007055.3:c.1862G>A        | NP_008986.2.p.(Gly621Asp)          | 10  | 79769342    | C           | T           | N  | N  | N  | N  | Y  | N  | N  | N  | N  | N   | Y   | N   | N   | Y   | Y          | LIKELY PATHOGENIC | SCV003920808              |
| POLR3B   | IDSPG66  | AD                         | nonsynonymous SNV      | NC_000012.11:g.106760479C>G           | NM_018082.5:c.206C>G         | NP_060552.4.p.(Ala69Gly)           | 12  | 106760479   | C           | G           | N  | N  | N  | N  | Y  | N  | N  | N  | N  | N   | Y   | N   | N   | Y   | Y          | VUS               | SCV003920810              |
| REEP1    | IDSPG12  | AD                         | nonsynonymous SNV      | NC_000002.11:g.86491094A>T            | NM_022912.2:c.176T>A         | NP_075063.1.p.(Leu59His)           | 2   | 86491094    | A           | T           | N  | N  | N  | Y  | N  | N  | N  | N  | N  | N   | Y   | N   | N   | Y   | Y          | LIKELY PATHOGENIC | SCV003920811              |
| REEP1    | IDSPG124 | AD                         | stopgain               | NC_000002.11:g.86479160G>A            | NM_022912.2:c.337C>T         | NP_075063.1.p.(Arg113Ter)          | 2   | 86479160    | G           | A           | Y  | N  | N  | Y  | N  | N  | N  | N  | N  | N   | Y   | N   | N   | Y   | Y          | PATHOGENIC        | SCV003920812              |
| RNASEH2B | IDLNF141 | AR (Homozygous)            | nonsynonymous SNV      | NC_000013.10:g.51519581G>A            | NM_024570.3:c.529G>A         | NP_078846.2.p.(Ala177Thr)          | 13  | 51519581    | G           | A           | N  | N  | N  | Y  | N  | N  | N  | N  | N  | N   | Y   | N   | N   | Y   | Y          | PATHOGENIC        | SCV003920813              |
| SARS1    | IDSPG64  | AD                         | splicing               | NC_000001.10:g.109778054_109778056del | NM_006513.4:c.969+1_969+3del | NP_006504.2.p.?                    | 1   | 109778052   | AGGT        | A           | Y  | N  | Y  | N  | Y  | N  | N  | N  | N  | N   | Y   | N   | N   | Y   | Y          | PATHOGENIC        | SCV003920814              |
| SEPSECS  | IDLNF121 | AR (Homozygous)            | non-canonical splicing | NC_000004.11:g.25161875T>C            | NM_016955.3:c.114+3A>G       | NP_058651.3.p.?                    | 4   | 25161875    | T           | C           | Y  | N  | N  | Y  | N  | N  | N  | N  | N  | N   | Y   | N   | N   | Y   | Y          | PATHOGENIC        | SCV003920815              |
| SEPSECS  | IDLNF67  | AR (Homozygous)            | non-canonical splicing | NC_000004.11:g.25161875T>C            | NM_016955.3:c.114+3A>G       | NP_058651.3.p.?                    | 4   | 25161875    | T           | C           | Y  | N  | N  | Y  | N  | N  | N  | N  | N  | N   | Y   | N   | N   | Y   | Y          | PATHOGENIC        | SCV003920815              |
| SHMT2    | IDSPG26  | AR (Homozygous)            | nonsynonymous SNV      | NC_000012.11:g.57628124C>G            | NM_005412.3:c.149S>C>G       | NP_005403.2.p.(Pro499Ala)          | 12  | 57628124    | C           | G           | N  | N  | N  | Y  | N  | N  | N  | N  | N  | N   | Y   | N   | N   | Y   | Y          | LIKELY PATHOGENIC | SCV003920816              |
| SLC25A46 | IDSPG93  | AR (Homozygous)            | nonsynonymous SNV      | NC_000005.9:g.110097243C>T            | NM_138773.3:c.1018C>T        | NP_620128.1.p.(Arg340Cys)          | 5   | 110097243   | C           | T           | N  | N  | N  | Y  | N  | N  | N  | N  | N  | N   | Y   | N   | N   | Y   | Y          | PATHOGENIC        | SCV003920817              |
| SLC35B2  | IDLNF68  | AR (Homozygous)            | frameshift deletion    | NC_000006.12:g.44222516ACT>A          | NM_178148.4:c.1224_1225delAG | NP_835361.1.p.Arg408SerfsTer18     | 6   | 44222516    | ACT         | A           | Y  | N  | N  | Y  | N  | N  | N  | N  | N  | N   | Y   | N   | N   | Y   | Y          | PATHOGENIC        | SCV003920818              |
| SPAST    | IDSPG132 | AD                         | deletion               | 2p22.3(32337285-32350543)x1           |                              |                                    | 2   | 32337285    |             |             | Y  | N  | N  | Y  | N  | N  | N  | N  | N  | Y   | N   | N   | Y   | Y   | PATHOGENIC | SCV003920819      |                           |
| SPAST    | IDSPG160 | AD                         | nonsynonymous SNV      | NC_000002.11:g.32366986C>T            | NM_014946.3:c.1507C>T        | NP_055761.2.p.(Arg503Trp)          | 2   | 32366986    | C           | T           | N  | N  | N  | Y  | N  | N  | N  | N  | N  | N   | Y   | N   | N   | Y   | Y          | LIKELY PATHOGENIC | SCV003920821              |
| SPAST    | IDSPG73  | AD                         | nonsynonymous SNV      | NC_000002.11:g.32361662C>G            | NM_014946.3:c.1276C>G        | NP_055761.2.p.(Leu426Val)          | 2   | 32361662    | C           | G           | N  | N  | N  | Y  | N  | N  | N  | N  | N  | N   | Y   | N   | N   | Y   | Y          | PATHOGENIC        | SCV003920822              |
| SPAST    | IDSPG9   | AD                         | splicing               | NC_000002.11:g.32362038G>A            | NM_014946.3:c.1413+1G>A      | NP_055761.2.p.?                    | 2   | 32362038    | G           | A           | Y  | N  | N  | Y  | N  | N  | N  | N  | N  | N   | Y   | N   | N   | Y   | Y          | PATHOGENIC        | SCV003920823              |
| SPG11    | IDSPG20  | AR (Compound Heterozygous) | stopgain               | NC_000015.9:g.44856746T>A             | NM_001160227.1:c.6811A>T     | NP_001153699.1.p.(Lys2271Ter)      | 15  | 44856746    | T           | A           | Y  | N  | N  | Y  | N  | N  | N  | N  | N  | N   | Y   | N   | N   | Y   | Y          | LIKELY PATHOGENIC | SCV003920824              |
| SPG11    | IDSPG20  | AR (Compound Heterozygous) | non-canonical splicing | NC_000015.9:g.44862719T>C             | NM_001160227.1:c.6138+4A>G   | NP_001153699.1.p.?                 | 15  | 44862719    | T           | C           | Y  | N  | N  | Y  | N  | N  | N  | N  | N  | N   | Y   | N   | N   | Y   | Y          | PATHOGENIC        | SCV003920825              |
| SPG11    | IDSPG24  | AR (Compound Heterozygous) | stopgain               | NC_000015.9:g.44876685C>T             | NM_001160227.1:c.5193G>A     | NP_001153699.1.p.(Trp1731Ter)      | 15  | 44876685    | C           | T           | Y  | N  | N  | Y  | N  | N  | N  | N  | N  | N   | Y   | N   | N   | Y   | Y          | PATHOGENIC        | SCV003920826              |
| SPG11    | IDSPG24  | AR (Compound Heterozygous) | frameshift deletion    | NC_000015.9:g.44949428_44949429del    | NM_001160227.1:c.733_734del  | NP_001153699.1.p.(Met245ValfsTer2) | 15  | 44949427    | CAT         | C           | Y  | N  | N  | Y  | N  | N  | N  | N  | N  | N   | Y   | N   | N   | Y   | Y          | PATHOGENIC        | SCV003920827              |
| SPG11    | IDSPG40  | AR (Compound Heterozygous) | frameshift insertion   | NC_000015.9:g.44859639dup             | NM_001160227.1:c.6399dup     | NP_001153699.1.p.(Glu2134Ter)      | 15  | 44859637    | C           | CA          | Y  | N  | N  | Y  | N  | N  | N  | N  | N  | N   | Y   | N   | N   | Y   | Y          | PATHOGENIC        | SCV003920828              |
| SPG11    | IDSPG40  | AR (Compound Heterozygous) | stopgain               | NC_000015.9:g.44912518C>A             | NM_001160227.1:c.2704G>T     | NP_001153699.1.p.(Glu902Ter)       | 15  | 44912518    | C           | A           | Y  | N  | N  | Y  | N  | N  | N  | N  | N  | N   | Y   | N   | N   | Y   | Y          | PATHOGENIC        | SCV003920829              |
| SPG11    | IDSPG48  | AR (Homozygous)            | frameshift deletion    | NC_000015.9:g.44949428_44949429del    | NM_001160227.1:c.733_734del  | NP_001153699.1.p.(Met245ValfsTer2) | 15  | 44949427    | CAT         | C           | Y  | N  | N  | Y  | N  | N  | N  | N  | N  | N   | Y   | N   | N   | Y   | Y          | PATHOGENIC        | SCV003920827              |
| SPG11    | IDSPG99  | AR (Compound Heterozygous) | splicing               | NC_000015.9:g.44876011C>T             | NM_025137.3:c.5866+1G>A      | NP_079413.3.p.?                    | 15  | 44876011    | C           | T           | Y  | N  | N  | Y  | N  | N  | N  | N  | N  | N   | Y   | N   | N   | Y   | Y          | PATHOGENIC        | SCV003920830              |
| SPG11    | IDSPG99  | AR (Compound Heterozygous) | frameshift deletion    | NC_000015.9:g.44943705del             | NM_001160227.1:c.1440del     | NP_001153699.1.p.(Cys481AlafsTer4) | 15  | 44943704    | AC          | A           | Y  | N  | N  | Y  | N  | N  | N  | N  | N  | N   | Y   | N   | N   | Y   | Y          | PATHOGENIC        | SCV003920832              |
| SPG7     | IDSPG21  | AR (Compound Heterozygous) | nonsynonymous SNV      | NC_000016.9:g.89623308T>C             | NM_003119.2:c.2195T>C        | NP_003110.1.p.(Leu732Pro)          | 16  | 89623308    | T           | C           | N  | N  | N  | Y  | N  | N  | N  | N  | N  | N   | Y   | N   | N   | Y   | Y          | PATHOGENIC        | SCV003920833              |
| SPG7     | IDSPG21  | AR (Compound Heterozygous) | non-canonical splicing | NC_000016.9:g.89577853A>G             | NM_003119.3:c.286+853A>G     | NP_003110.1.p.?                    | 16  | 89577853    | A           | G           | Y  | N  | N  | Y  | N  | N  | N  | N  | N  | N   | Y   | N   | N   | Y   | Y          | PATHOGENIC        | SCV003920834              |
| SPG7     | IDSPG23  | AR (Homozygous)            | nonframeshift deletion | NC_000016.9:g.89597161_89597163del    | NM_003119.3:c.932_934del     | NP_003110.1.p.(Val311del)          | 16  | 89597159    | CGTG        | C           | N  | N  | N  | Y  | N  | N  | N  | N  | N  | N   | Y   | N   | N   | Y   | Y          | LIKELY PATHOGENIC | SCV003920835              |
| SPG7     | IDSPG30  | AR (Homozygous)            | nonsynonymous SNV      | NC_000016.9:g.89620266G>A             | NM_003119.3:c.2001G>A        | NP_003110.1.p.(Met667Ile)          | 16  | 89620266    | G           | A           | N  | N  | N  | Y  | N  | N  | N  | N  | N  | N   | Y   | N   | N   | Y   | Y          | LIKELY PATHOGENIC | SCV003920836              |
| SPG7     | IDSPG33  | AR (Homozygous)            | frameshift deletion    | NC_000016.9:g.89613070_89613078del    | NM_003119.3:c.1454_1462del   | NP_003110.1.p.(Arg485_Glu487del)   | 16  | 89613064    | AGGAGAG GCG | A           | Y  | N  | N  | Y  | N  | N  | N  | N  | N  | N   | Y   | N   | N   | Y   | Y          | PATHOGENIC        | SCV003920837              |
| SPTAN1   | IDSPG134 | AD                         | nonsynonymous SNV      | NC_000009.11:g.131329074C>T           | NM_001130438.2:c.55C>T       | NP_001123910.1.p.(Arg19Trp)        | 9   | 131329074   | C           | T           | N  | N  | Y  | N  | N  | N  | N  | N  | N  | N   | Y   | N   | N   | Y   | Y          | PATHOGENIC        | SCV003920838              |
| SPTBN2   | IDSPG125 | AD                         | frameshift deletion    | NC_000011.9:g.66457740del             | NM_006946.2:c.5581del        | NP_008877.1.p.(Asp1861ThrfsTer59)  | 11  | 66457738    | TC          | T           | Y  | N  | N  | Y  | N  | N  | N  | N  | N  | N   | Y   | N   | N   | Y   | Y          | PATHOGENIC        | SCV003920839              |
| SVBP     | IDSPG8   | AR (Homozygous)            | nonsynonymous SNV      | NC_000001.10:g.43273140A>G            | NM_199342.3:c.146T>C         | NP_955374.1.p.(Leu49Pro)           | 1   | 43273140    | A           | G           | N  | N  | N  | Y  | N  | N  | N  | N  | N  | N   | Y   | N   | N   | Y   | Y          | LIKELY PATHOGENIC | SCV003920840              |
| SVBP     | IDSPG46  | AR (Homozygous)            | nonsynonymous SNV      | NC_000001.10:g.43273140A>G            | NM_199342.3:c.146T>C         | NP_955374.1.p.(Leu49Pro)           | 1   | 43273140    | A           | G           | N  | N  | N  | Y  | N  | N  | N  | N  | N  | N   | Y   | N   | N   | Y   | Y          | LIKELY PATHOGENIC | SCV003920840              |

| Gene    | ID       | Inheritance                | Type                | Genomic GRCh37 description          | Transcript description   | Protein description             | Chr | VCF Genomic | Reference | Alternative | P<br>V<br>S<br>I | P<br>S<br>1 | P<br>S<br>2 | P<br>S<br>3 | P<br>M<br>1 | P<br>M<br>2 | P<br>M<br>3 | P<br>M<br>4 | P<br>M<br>5 | P<br>M<br>6 | P<br>P<br>1 | P<br>P<br>2 | P<br>P<br>3 | P<br>P<br>4 | P<br>P<br>5 | CONCLUSION        | ClinVar accession numbers |
|---------|----------|----------------------------|---------------------|-------------------------------------|--------------------------|---------------------------------|-----|-------------|-----------|-------------|------------------|-------------|-------------|-------------|-------------|-------------|-------------|-------------|-------------|-------------|-------------|-------------|-------------|-------------|-------------|-------------------|---------------------------|
| TAF1    | IDSPG71  | X-Linked                   | nonsynonymous SNV   | NC_000023.10:g.70679465G>T          | NM_001286074.1:c.5194G>T | NP_001273003.1:p.(Ala173Ser)    | X   | 70679465    | G         | T           | N<br>O           | N<br>O      | N<br>O      | N<br>O      | N<br>O      | Y<br>E<br>S | N<br>O      | N<br>O      | N<br>O      | N<br>O      | N<br>O      | Y<br>E<br>S | N<br>O      | Y<br>E<br>S | N<br>O      | VUS               | SCV003920841              |
| TMEM240 | IDSPG92  | AD                         | nonsynonymous SNV   | NC_000001.10:g.1470752G>A           | NM_001114748.1:c.509C>T  | NP_001108220.1:p.(Pro170Leu)    | 1   | 1470752     | G         | A           | N<br>O           | N<br>O      | Y<br>E<br>S | N<br>O      | N<br>O      | Y<br>E<br>S | N<br>O      | N<br>O      | N<br>O      | N<br>O      | N<br>O      | Y<br>E<br>S | N<br>O      | Y<br>E<br>S | Y<br>E<br>S | PATHOGENIC        | SCV003920741              |
| TRMT5   | IDSPG120 | AR (Compound Heterozygous) | frameshift deletion | NC_000014.8:g.61446302_61446305del  | NM_020810.3:c.312_315del | NP_065861.3:p.(Ile105SerfsTer4) | 14  | 61446300    | CTATT     | C           | Y<br>E<br>S      | N<br>O      | N<br>O      | Y<br>E<br>S | N<br>O      | N<br>O      | N<br>O      | N<br>O      | N<br>O      | N<br>O      | N<br>O      | N<br>O      | N<br>O      | Y<br>E<br>S | Y<br>E<br>S | PATHOGENIC        | SCV003920742              |
| TRMT5   | IDSPG120 | AR (Compound Heterozygous) | nonsynonymous SNV   | NC_000014.8:g.61445951A>G           | NM_020810.3:c.665T>C     | NP_065861.3:p.(Ile222Thr)       | 14  | 61445951    | A         | G           | N<br>O           | N<br>O      | N<br>O      | N<br>O      | N<br>O      | Y<br>E<br>S | N<br>O      | N<br>O      | N<br>O      | N<br>O      | N<br>O      | N<br>O      | Y<br>E<br>S | Y<br>E<br>S | Y<br>E<br>S | LIKELY PATHOGENIC | SCV003920743              |
| UBAP1   | IDSPG76  | AD                         | frameshift deletion | NC_000009.11:g.34241499_34241500del | NM_016525.4:c.476_477del | NP_057609.2:p.(Phe159Ter)       | 9   | 34241497    | CTT       | C           | Y<br>E<br>S      | N<br>O      | N<br>O      | N<br>O      | N<br>O      | Y<br>E<br>S | N<br>O      | N<br>O      | N<br>O      | N<br>O      | Y<br>E<br>S | N<br>O      | Y<br>E<br>S | Y<br>E<br>S | PATHOGENIC  | SCV003920744      |                           |

Table S5. ACMG criteria for identified variant classification.

**Table S6**

| <b>Gene</b>    | <b>OMIM Associated Phenotype</b>                                                                     | <b>MIM Number</b> | <b>Inheritance mode</b> | <b>Cases</b> |
|----------------|------------------------------------------------------------------------------------------------------|-------------------|-------------------------|--------------|
| <i>POLR3A</i>  | Leukodystrophy, hypomyelinating, 7, with or without oligodontia and/or hypogonadotropic hypogonadism | 607694            | AR                      | 5            |
| <i>RFC1</i>    | Cerebellar ataxia, neuropathy, and vestibular areflexia syndrome                                     | 614575            | AR                      | 5            |
| <i>SPG11</i>   | Spastic paraplegia 11, autosomal recessive,                                                          | 604360            | AR                      | 5            |
| <i>BSCL2</i>   | Silver spastic paraplegia syndrome                                                                   | 260685            | AD                      | 4            |
| <i>SPAST</i>   | Spastic paraplegia 4, autosomal dominant                                                             | 182601            | AD                      | 4            |
| <i>SPG7</i>    | Spastic paraplegia 7, autosomal recessive                                                            | 607259            | AR                      | 4            |
| <i>ATL1</i>    | Spastic paraplegia 3A, autosomal dominant                                                            | 182600            | AD                      | 3            |
| <i>KIF1A</i>   | Spastic paraplegia 30, autosomal recessive / Spastic paraplegia 30, autosomal dominant               | 601357            | AD/AR                   | 3            |
| <i>CACNA1A</i> | Episodic ataxia, type 2                                                                              | 108500            | AD                      | 2            |
| <i>IFIH1</i>   | Aicardi-Goutieres syndrome 7                                                                         | 615846            | AD                      | 2            |
| <i>IRF2BPL</i> | Neurodevelopmental disorder with regression, abnormal movements, loss of speech, and seizures        | 618088            | AD                      | 2            |
| <i>IRF2BPL</i> | Neurodevelopmental disorder with ataxia, hypotonia, and microcephaly                                 | 618569            | AR                      | 2            |
| <i>PI4KA</i>   | Polymicrogyria, perisylvian, with cerebellar hypoplasia and arthrogryposis                           | 616531            | AR                      | 2            |
| <i>REEP1</i>   | Spastic paraplegia 31, autosomal dominant                                                            | 610250            | AD                      | 2            |
| <i>SEPSECS</i> | Pontocerebellar hypoplasia type 2D                                                                   | 613811            | AR                      | 2            |
| <i>SVBP</i>    | Neurodevelopmental disorder with ataxia, hypotonia, and microcephaly                                 | 618569            | AR                      | 2            |
| <i>ACER3</i>   | Leukodystrophy, progressive, early childhood-onset                                                   | 617762            | AR                      | 1            |
| <i>AFG3L2</i>  | Spinocerebellar ataxia 28 / Spastic ataxia 5, autosomal recessive                                    | 610246            | AD                      | 1            |
| <i>ALS2</i>    | Spastic paralysis, infantile onset ascending                                                         | 607225            | AR                      | 1            |
| <i>AMPD2</i>   | Spastic paraplegia 63                                                                                | 515686            | AR                      | 1            |
| <i>AP4B1</i>   | Spastic paraplegia 47, autosomal recessive                                                           | 614066            | AR                      | 1            |
| <i>BCKDK</i>   | Branched-chain ketoacid dehydrogenase kinase deficiency                                              | 614923            | AR                      | 1            |
| <i>CAPN1</i>   | Spastic paraplegia 76, autosomal recessive                                                           | 616907            | AR                      | 1            |
| <i>CAPN10</i>  | *                                                                                                    |                   | AR                      | 1            |
| <i>CC2D2A</i>  | Joubert syndrome 9                                                                                   | 612285            | AR                      | 1            |
| <i>COL6A3</i>  | Dystonia 27                                                                                          | 616411            | AR                      | 1            |
| <i>CTNNB1</i>  | Neurodevelopmental disorder with spastic diplegia and visual defects                                 | 615075            | AD                      | 1            |
| <i>CYP2U1</i>  | Spastic paraplegia 56, autosomal recessive                                                           | 615030            | AR                      | 1            |
| <i>DDHD2</i>   | Spastic paraplegia 54, autosomal recessive                                                           | 615033            | AR                      | 1            |
| <i>DLG4</i>    | Intellectual developmental disorder 62                                                               | 618793            | AD                      | 1            |

| <b>Gene</b>      | <b>OMIM Associated Phenotype</b>                                                     | <b>MIM Number</b> | <b>Inheritance mode</b> | <b>Cases</b> |
|------------------|--------------------------------------------------------------------------------------|-------------------|-------------------------|--------------|
| <i>DSTYK</i>     | Spastic paraplegia 23                                                                | 270750            | AR                      | 1            |
| <i>ERBB4</i>     | Amyotrophic lateral sclerosis 19                                                     | 615515            | AD                      | 1            |
| <i>FA2H</i>      | Spastic paraplegia 35, autosomal recessive                                           | 612319            | AR                      | 1            |
| <i>FARS2</i>     | Spastic paraplegia 77, autosomal recessive                                           | 617046            | AR                      | 1            |
| <i>GFAP</i>      | Alexander disease                                                                    | 203450            | AD                      | 1            |
| <i>IQSEC2</i>    | Intellectual developmental disorder, X-linked 1                                      | 309530            | XLD                     | 1            |
| <i>KCNA1</i>     | Episodic ataxia/myokymia syndrome                                                    | 160120            | AD                      | 1            |
| <i>KIDINS220</i> | Spastic paraplegia, intellectual disability, nystagmus, and obesity                  | 617296            | AD                      | 1            |
| <i>KIF5A</i>     | Spastic paraplegia 10, autosomal dominant                                            | 604187            | AD                      | 1            |
| <i>KMT2B</i>     | Dystonia 28, childhood-onset                                                         | 617284            | AD                      | 1            |
| <i>L2HGDH</i>    | L-2-hydroxyglutaric aciduria                                                         | 236792            | AR                      | 1            |
| <i>LAMA1</i>     | Poretti-Boltshauser syndrome                                                         | 615960            | AR                      | 1            |
| <i>LONP1</i>     | CODAS syndrome                                                                       | 600373            | AR                      | 1            |
| <i>MMUT</i>      | Methylmalonic aciduria, mut(0) type                                                  | 251000            | AR                      | 1            |
| <i>MORC2</i>     | Charcot-Marie-Tooth disease, axonal, type 2Z                                         | 616688            | AD                      | 1            |
| <i>NDUFS6</i>    | Mitochondrial complex I deficiency, nuclear type 9                                   | 618232            | AR                      | 1            |
| <i>PAX6</i>      | Aniridia                                                                             | 106210            | AD                      | 1            |
| <i>PCYT2</i>     | Spastic paraplegia 82, autosomal recessive                                           | 618770            | AR                      | 1            |
| <i>PKK3</i>      | Charcot-Marie-Tooth disease, X-linked dominant, 6                                    | 300905            | XLD                     | 1            |
| <i>PMM2</i>      | Congenital disorder of glycosylation, type Ia                                        | 212065            | AR                      | 1            |
| <i>PNKP</i>      | Ataxia-oculomotor apraxia 4                                                          | 616267            | AR                      | 1            |
| <i>PNPLA6</i>    | Spastic paraplegia 39, autosomal recessive                                           | 612020            | AR                      | 1            |
| <i>POLG</i>      | Mitochondrial recessive ataxia syndrome                                              | 607459            | AR                      | 1            |
| <i>POLR3B</i>    | **                                                                                   |                   | AD                      | 1            |
| <i>RNASEH2B</i>  | Aicardi-Goutieres syndrome 2                                                         | 610181            | AR                      | 1            |
| <i>SARS1</i>     | ***                                                                                  |                   | AD                      | 1            |
| <i>SHMT2</i>     | Neurodevelopmental disorder with cardiomyopathy, spasticity, and brain abnormalities | 619121            | AR                      | 1            |
| <i>SLC25A46</i>  | Neuropathy, hereditary motor and sensory, type VIB                                   | 616505            | AR                      | 1            |
| <i>SLC35B2</i>   | ****                                                                                 |                   | AR                      | 1            |
| <i>SPTAN1</i>    | Developmental and epileptic encephalopathy 5                                         | 613477            | AD                      | 1            |
| <i>SPTBN2</i>    | Spinocerebellar ataxia 5                                                             | 600224            | AD                      | 1            |

| <b>Gene</b>    | <b>OMIM Associated Phenotype</b>                 | <b>MIM Number</b> | <b>Inheritance mode</b> | <b>Cases</b> |
|----------------|--------------------------------------------------|-------------------|-------------------------|--------------|
| <i>TAF1</i>    | Mental retardation, X-linked, syndromic 33       | 314250            | XLD                     | 1            |
| <i>TMEM240</i> | Spinocerebellar ataxia 21                        | 607454            | AD                      | 1            |
| <i>TRMT5</i>   | Combined oxidative phosphorylation deficiency 26 | 616539            | AR                      | 1            |
| <i>UBAP1</i>   | Spastic paraplegia 80, autosomal dominant        | 618418            | AD                      | 1            |

AD: Autosomal Dominant

AR: Autosomal Recessive

\* Loss of function mutations in CAPN10 have been linked to recessive intellectual disability [48]

\*\* heterozygous mutations in POLR3B have been linked to ataxia, spasticity and demyelinating neuropathy [49]

\*\*\* heterozygous variants in SARS1 have been linked to spastic paraparesis with ataxia, global developmental delay, intellectual disability and febrile seizures [46]

\*\*\*\* biallelic variants in SLC35B2 have been linked to hypomyelinating leukodystrophy [50]

**Table S6.** List of identified genes, OMIM nomenclature and numbers of cases identified in our cohort.

**Table S7**

| Gene             | ID                | Variant                          | Inheritance                | Type                         | Functional testing                                                                           | Description of functional tests performed at the laboratory                                                                                                                                                                                                                                                                                                                                                                                                                                                                                                                                |
|------------------|-------------------|----------------------------------|----------------------------|------------------------------|----------------------------------------------------------------------------------------------|--------------------------------------------------------------------------------------------------------------------------------------------------------------------------------------------------------------------------------------------------------------------------------------------------------------------------------------------------------------------------------------------------------------------------------------------------------------------------------------------------------------------------------------------------------------------------------------------|
| <i>ACER3</i>     | IDSPG75           | NP_060837.3:p.(Gly211Cys)        | AR (Homozygous)            | nonsynonymous SNV            | <b>targeted lipidomics and qRT-PCR analysis</b>                                              | To validate ACER3 variants, a targeted lipidomics analysis towards sphingolipids was performed demonstrating a similar lipid profile as the already published for Edvardson et al, Journal of Medical Genetics 2016 [30]. Moreover, qRT-PCR analysis showed decreased mRNA expression of ACER3 in patients' fibroblasts.                                                                                                                                                                                                                                                                   |
| <i>FA2H</i>      | IDSPG10           | NP_077282.3:p.(Lys262Thr)        | AR (Homozygous)            | nonsynonymous SNV            | <b>microarray and methylation assay</b>                                                      | Sanger analysis revealed that SPG-10 patient was homozygous for p.(Lys262Thr) variant whereas the father was heterozygous carrier and the mother did not carry FA2H mutation. A microsatellite array revealed uniparental disomy (UPD) leading to homozygous FA2H mutation. UPD was confirmed by microarray analysis and methylation profiling [51,52].                                                                                                                                                                                                                                    |
| <i>GFAP</i>      | IDSPG4            | NP_001124491.1:p.(Gly18Val)      | AD                         | nonsynonymous SNV            | <b>transfection assay</b>                                                                    | GFAP transfection assay showed that U251-MG cells transfected with GFAP-EGFP-expressing plasmid carrying the mutation (p.Gly18Val) resulted into an enlarged cell size compared to cells transfected with wild-type GFAP-EGFP [24].                                                                                                                                                                                                                                                                                                                                                        |
| <i>KCNA1</i>     | IDLNF52           | NP_000208.2:p.(Val368Leu)        | AR (Homozygous)            | nonsynonymous SNV            | <b>cellular assay and patch clamp recording</b>                                              | Patch-clamp studies of variant p.Val368Leu revealed that mutant protein alone failed to produce functional channels in homozygous state, while coexpression with wild-type produced no effects on K <sup>+</sup> currents, similar to wild-type protein alone. These findings are concordant with the reported mode of inheritance in this family and the severity of the patient's phenotype [45].                                                                                                                                                                                        |
| <i>KIDINS220</i> | IDSPG118          | NM_020738.3:c.4054-1G>C          | AD                         | splicing                     | <b>cDNA analysis</b>                                                                         | Sanger sequencing of PBMC cDNA revealed that c.4054-1G>C results into skipping of 337 bp, resulting into a truncated transcript (p.Ser1352Glyfs*44) not targeted by NMD. Truncated C-term of <i>KIDINS220</i> is a constant finding in <i>KIDINS220</i> -related patients.                                                                                                                                                                                                                                                                                                                 |
| <i>LAMA1</i>     | IDSPG56           | NM_005559.3:c.1423-12C>G         | AR (Compound Heterozygous) | non-canonical splicing       | <b>minigene and qRT-PCR analysis</b>                                                         | To confirm the association between the c.1423-12 C>G <i>LAMA1</i> variant and the partial inclusion of exon 11, we performed a minigene splicing assay. Semi-quantitative fluorescent RT-PCR revealed a normal/abnormal-splicing ratio of 0.8 for the wild-type allele and 0.2 for the mutated allele. This intronic mutation resulted into generation of various isoforms in the minigene splicing assay, showing that ~20% residual wild-type isoform is still expressed by the intronic-mutated allele alone.                                                                           |
| <i>PCYT2</i>     | IDSPG27           | NP_001171846.1:p.(Lys319Asn)     | AR (Homozygous)            | nonsynonymous SNV + splicing | <b>targeted lipidomics and cDNA analysis</b>                                                 | A targeted lipidomics analysis towards phospholipids was performed demonstrating a similar lipid profile as the already published for Vaz et al 48. Moreover, cDNA analysis showed two different transcripts for Case1: the first carried the missense variant, whereas the second used an alternative donor site in intron 11, resulting in the inclusion of 102 bp into the coding sequence, leading to the insertion of 34 amino as described in Vélez-Santamaría et al [53].                                                                                                           |
| <i>PI4KA</i>     | IDSPG16           | NP_477352.3:p.(Thr2053SerfsTer4) | AR (Compound Heterozygous) | frameshift deletion          | <b>targeted lipidomics</b>                                                                   | A targeted lipidomics analysis detecting phosphatidylinositol (PI) and its phosphorylated forms (PIP and PIP2) was performed. All of the patients showed a significantly decreased PIP/PI ratio compared to age-matched controls, indicating decreased PI4KA activity in these patients. Moreover, Western Blot with an antibody anti-PI4KA (12411-1-AP Proteintech) corroborated lower protein levels. Finally, immunofluorescence detecting decreased reaction product with an antibody anti-PI(4)P (Z-P004, Echelon Biosciences Inc.) was performed as described in Verdura et al [54]. |
| <i>PI4KA</i>     | IDSPG16           | NP_477352.3:p.(Glu1820del)       | AR (Compound Heterozygous) | frameshift deletion          | <b>targeted lipidomics</b>                                                                   | A targeted lipidomics analysis detecting phosphatidylinositol (PI) and its phosphorylated forms (PIP and PIP2) was performed. All of the patients showed a significantly decreased PIP/PI ratio compared to age-matched controls, indicating decreased PI4KA activity in these patients. Moreover, Western Blot with an antibody anti-PI4KA (12411-1-AP Proteintech) corroborated lower protein levels. Finally, immunofluorescence detecting decreased reaction product with an antibody anti-PI(4)P (Z-P004, Echelon Biosciences Inc.) was performed as described in Verdura et al [54]. |
| <i>SARS1</i>     | IDSPG64           | NM_006513.4:c.969+1_969+3del     | AD                         | non-canonical splicing       | <b>yeast complementation studies, serylation assays, Western blot and Immunofluorescence</b> | The <i>SARS1</i> c.969+1_969+3del variant causes the ablation of a canonical splice site in the boundary of exon 7 and intron 7. Functional analysis showed that this change causes the inclusion of 16 intronic bp into the cDNA, which results in a loss-of-function, dominant negative effect in complementation assays in <i>S. cerevisiae</i> and serylation assays [46].                                                                                                                                                                                                             |
| <i>SEPSECS</i>   | IDLNF67, IDLNF121 | NM_016955.3:c.114+3A>G           | AR (Homozygous)            | non-canonical splicing       | <b>minigene and cDNA analysis</b>                                                            | Minigene splicing assay revealed that variant c.32+3A>G results into skipping of <i>SEPSECS</i> 's exon 1, which contains the ATG start codon, and thus results into a loss of function. This skipping was also confirmed in PBMC's cDNA from a patient carrying the same variant in homozygosis.                                                                                                                                                                                                                                                                                          |



| Gene           | ID              | Variant                        | Inheritance                | Type                | Functional testing                                             | Description of functional tests performed at the laboratory                                                                                                                                                                                                                                                                                                                                                                                                                                                                       |
|----------------|-----------------|--------------------------------|----------------------------|---------------------|----------------------------------------------------------------|-----------------------------------------------------------------------------------------------------------------------------------------------------------------------------------------------------------------------------------------------------------------------------------------------------------------------------------------------------------------------------------------------------------------------------------------------------------------------------------------------------------------------------------|
| <i>SHMT2</i>   | IDSPG26         | NP_005403.2:p.(Pro499Ala)      | AR (Homozygous)            | nonsynonymous SNV   | <b>targeted metabolomics, mitochondrial redox metabolism</b>   | A targeted metabolites analysis towards key pathways catalyzed by this enzyme was performed detecting a significant decrease in glycine/serine ratio and an increase in 5-methyltetrahydrofolate/folate ratio compared to controls. Moreover, a knockdown approach for disease modeling in <i>Drosophila melanogaster</i> was performed as described in Garcia-Cazorla et al [55].                                                                                                                                                |
| <i>SLC35B2</i> | IDLNF68         | NP_835361.1:p.Arg408SerfsTer18 | AR (Homozygous)            | frameshift deletion | <b>transfection assay, Western blot and qRT-PCR analysis</b>   | RT-PCR analysis performed on mRNA extracted from skin fibroblasts showed a significant decrease in the level of SLC35B2 mRNA compared to controls. The SLC35B2 p.Arg408SerfsTer18 variant affected mRNA expression and protein mislocalization in transfected HEK293F cells. It also altered the sulfation of chondroitin sulfate disaccharides in the patient's fibroblasts. This loss-of-function variant causes protein mislocalization from the Golgi apparatus, resulting in decreased sulfation of glycosaminoglycans [50]. |
| <i>SPG11</i>   | IDSPG20         | NM_001160227.1:c.6138+4A>G     | AR (Compound Heterozygous) | splicing            | <b>cDNA analysis</b>                                           | Sanger sequencing of PBMC cDNA revealed that variant c.6138+4A>G results into skipping of SPG11's exon 34 (134 pb), resulting into an out-of-frame transcript targeted by NMD.                                                                                                                                                                                                                                                                                                                                                    |
| <i>SPG7</i>    | IDSPG21         | NM_003119.3:c.286+853A>G       | AR (Compound Heterozygous) | splicing            | <b>cDNA analysis</b>                                           | Sanger sequencing of fibroblast cDNA revealed that c.286+853A>G results into creation of a transcript which includes a 75 bp pseudoexon located in <i>SPG7</i> 's intron 2. This in-frame pseudoexon includes at least two codon stops. Western Blot showed reduced levels of SPG7, confirming a loss of function effect [47].                                                                                                                                                                                                    |
| <i>SVBP</i>    | IDSPG8, IDSPG46 | NP_955374.1:p.(Leu49Pro)       | AR (Homozygous)            | nonsynonymous SNV   | <b>transfection assay, Western blot and Immunofluorescence</b> | Western blot and Immunofluorescence for deTyrinated tyrosin, after paclitaxel treatment to increase deTyr-tubulin pools revealed a strong decrease of deTyr-tubulin levels in patients compared to controls. We have performed cotransfection studies of VASH1 and SVBP (WT/MUT) in HeLa cells showing that p.Leu49Pro variant reduces VASH1 and SVBP soluble quantities.                                                                                                                                                         |

**Table S7. Cases with functionally validated variants**

**Table S8**

| GOMFID     | Pvalue   | OddsRatio | ExpCount | Count | Size | Term                                                                                             |
|------------|----------|-----------|----------|-------|------|--------------------------------------------------------------------------------------------------|
| GO:0016491 | 7.47E-15 | 2.41      | 74.08    | 138   | 430  | oxidoreductase activity                                                                          |
| GO:0004812 | 4.11E-13 | 46.25     | 3.62     | 19    | 21   | aminoacyl-tRNA ligase activity                                                                   |
| GO:0016875 | 4.11E-13 | 46.25     | 3.62     | 19    | 21   | ligase activity, forming carbon-oxygen bonds                                                     |
| GO:0016597 | 1.75E-11 | 8.05      | 7.75     | 28    | 45   | amino acid binding                                                                               |
| GO:0015631 | 1.78E-09 | 2.55      | 36.52    | 72    | 212  | tubulin binding                                                                                  |
| GO:0003954 | 3.37E-09 | 13.77     | 3.96     | 17    | 23   | NADH dehydrogenase activity                                                                      |
| GO:0008137 | 3.37E-09 | 13.77     | 3.96     | 17    | 23   | NADH dehydrogenase (ubiquinone) activity                                                         |
| GO:0050136 | 3.37E-09 | 13.77     | 3.96     | 17    | 23   | NADH dehydrogenase (quinone) activity                                                            |
| GO:0003682 | 9.75E-09 | 2.00      | 67.02    | 111   | 389  | chromatin binding                                                                                |
| GO:0051536 | 1.02E-08 | 6.59      | 6.89     | 23    | 40   | iron-sulfur cluster binding                                                                      |
| GO:0051540 | 1.02E-08 | 6.59      | 6.89     | 23    | 40   | metal cluster binding                                                                            |
| GO:0016874 | 1.37E-08 | 3.65      | 15.33    | 38    | 89   | ligase activity                                                                                  |
| GO:0000049 | 3.70E-08 | 8.75      | 4.82     | 18    | 28   | tRNA binding                                                                                     |
| GO:0051539 | 3.70E-08 | 8.75      | 4.82     | 18    | 28   | 4 iron, 4 sulfur cluster binding                                                                 |
| GO:0031406 | 7.09E-08 | 2.76      | 23.95    | 50    | 139  | carboxylic acid binding                                                                          |
| GO:0030554 | 1.11E-07 | 1.55      | 167.28   | 227   | 971  | adenyl nucleotide binding                                                                        |
| GO:0032559 | 1.34E-07 | 1.55      | 165.90   | 225   | 963  | adenyl ribonucleotide binding                                                                    |
| GO:0022890 | 1.92E-07 | 1.99      | 54.78    | 91    | 318  | inorganic cation transmembrane transporter activity                                              |
| GO:0008324 | 2.22E-07 | 1.95      | 58.06    | 95    | 337  | cation transmembrane transporter activity                                                        |
| GO:0022836 | 3.21E-07 | 2.34      | 32.04    | 60    | 186  | gated channel activity                                                                           |
| GO:0043177 | 3.24E-07 | 2.58      | 24.98    | 50    | 145  | organic acid binding                                                                             |
| GO:0005244 | 3.37E-07 | 2.97      | 18.26    | 40    | 106  | voltage-gated ion channel activity                                                               |
| GO:0022832 | 3.37E-07 | 2.97      | 18.26    | 40    | 106  | voltage-gated channel activity                                                                   |
| GO:0016651 | 3.67E-07 | 4.22      | 9.65     | 26    | 56   | oxidoreductase activity, acting on NAD(P)H                                                       |
| GO:0008134 | 5.90E-07 | 1.77      | 76.83    | 117   | 446  | transcription factor binding                                                                     |
| GO:0005524 | 6.99E-07 | 1.52      | 159.53   | 214   | 926  | ATP binding                                                                                      |
| GO:0015075 | 7.13E-07 | 1.75      | 78.73    | 119   | 457  | ion transmembrane transporter activity                                                           |
| GO:0008017 | 7.92E-07 | 2.43      | 27.05    | 52    | 157  | microtubule binding                                                                              |
| GO:0022824 | 1.75E-06 | 4.64      | 7.41     | 21    | 43   | transmitter-gated ion channel activity                                                           |
| GO:0022835 | 1.75E-06 | 4.64      | 7.41     | 21    | 43   | transmitter-gated channel activity                                                               |
| GO:0140101 | 1.75E-06 | 4.64      | 7.41     | 21    | 43   | catalytic activity, acting on a tRNA                                                             |
| GO:0022843 | 1.94E-06 | 3.22      | 13.44    | 31    | 78   | voltage-gated cation channel activity                                                            |
| GO:0016655 | 2.19E-06 | 5.89      | 5.34     | 17    | 31   | oxidoreductase activity, acting on NAD(P)H, quinone or similar compound as acceptor              |
| GO:0022857 | 2.42E-06 | 1.65      | 92.17    | 133   | 535  | transmembrane transporter activity                                                               |
| GO:0015318 | 3.83E-06 | 1.71      | 74.60    | 111   | 433  | inorganic molecular entity transmembrane transporter activity                                    |
| GO:0046873 | 4.14E-06 | 2.02      | 39.62    | 67    | 230  | metal ion transmembrane transporter activity                                                     |
| GO:0098960 | 6.81E-06 | 4.08      | 7.92     | 21    | 46   | postsynaptic neurotransmitter receptor activity                                                  |
| GO:0019842 | 8.92E-06 | 2.91      | 14.30    | 31    | 83   | vitamin binding                                                                                  |
| GO:0005215 | 9.70E-06 | 1.56      | 105.60   | 146   | 613  | transporter activity                                                                             |
| GO:0044877 | 9.71E-06 | 1.46      | 154.53   | 202   | 897  | protein-containing complex binding                                                               |
| GO:0015267 | 1.15E-05 | 1.91      | 43.07    | 70    | 250  | channel activity                                                                                 |
| GO:0022803 | 1.15E-05 | 1.91      | 43.07    | 70    | 250  | passive transmembrane transporter activity                                                       |
| GO:0005216 | 1.35E-05 | 1.97      | 38.59    | 64    | 224  | ion channel activity                                                                             |
| GO:0015077 | 1.83E-05 | 1.96      | 37.38    | 62    | 217  | monovalent inorganic cation transmembrane transporter activity                                   |
| GO:0030594 | 2.13E-05 | 3.09      | 11.54    | 26    | 67   | neurotransmitter receptor activity                                                               |
| GO:0016595 | 2.47E-05 | 19.32     | 1.72     | 8     | 10   | glutamate binding                                                                                |
| GO:0019904 | 2.97E-05 | 1.59      | 84.59    | 119   | 491  | protein domain specific binding                                                                  |
| GO:1904315 | 2.98E-05 | 4.34      | 6.20     | 17    | 36   | transmitter-gated ion channel activity involved in regulation of postsynaptic membrane potential |
| GO:0001540 | 3.37E-05 | 3.15      | 10.51    | 24    | 61   | amyloid-beta binding                                                                             |
| GO:0008094 | 4.09E-05 | 2.86      | 12.58    | 27    | 73   | DNA-dependent ATPase activity                                                                    |

**Table S8. Molecular function GO terms enriched in the HSP network.** Top 50 molecular function (MF) GO terms enriched in the HSP network integrating proteins by using a hypergeometric distribution function statistical analysis. GOMFID, Gene Ontology term identification number; P value, probability value for each GO term tested; OddsRatio, the strength of the association; ExpCount, the expected number of selected genes annotated at the GO term; Count, the number of genes present in the HSP network that are annotated at the GO term; Size, the number of total proteins that are annotated at the GO term; Term, the GO term name.

**Table S9**

| GOBPID     | Pvalue   | OddsRatio | ExpCount | Count | Size | Term                                                  |
|------------|----------|-----------|----------|-------|------|-------------------------------------------------------|
| GO:0007417 | 7.18E-32 | 2.86      | 122.28   | 245   | 700  | central nervous system development                    |
| GO:0060322 | 5.91E-25 | 2.80      | 94.86    | 191   | 543  | head development                                      |
| GO:0030182 | 2.81E-24 | 2.29      | 162.29   | 280   | 929  | neuron differentiation                                |
| GO:0048666 | 1.01E-23 | 2.39      | 137.31   | 246   | 786  | neuron development                                    |
| GO:0019752 | 2.50E-23 | 2.49      | 119.31   | 221   | 683  | carboxylic acid metabolic process                     |
| GO:0007610 | 4.75E-23 | 3.01      | 72.85    | 155   | 417  | behavior                                              |
| GO:0043436 | 3.36E-22 | 2.38      | 128.22   | 230   | 734  | oxoacid metabolic process                             |
| GO:0007420 | 4.79E-22 | 2.70      | 89.62    | 177   | 513  | brain development                                     |
| GO:0006082 | 6.53E-22 | 2.35      | 130.32   | 232   | 746  | organic acid metabolic process                        |
| GO:0120036 | 8.22E-22 | 2.18      | 165.43   | 277   | 947  | plasma membrane bounded cell projection organization  |
| GO:0099536 | 8.30E-21 | 2.59      | 92.41    | 178   | 529  | synaptic signaling                                    |
| GO:0055114 | 1.45E-20 | 2.47      | 103.76   | 193   | 594  | oxidation-reduction process                           |
| GO:0030030 | 1.74E-20 | 2.12      | 168.57   | 277   | 965  | cell projection organization                          |
| GO:0099537 | 2.42E-20 | 2.60      | 89.62    | 173   | 513  | trans-synaptic signaling                              |
| GO:0060284 | 2.42E-20 | 2.38      | 114.60   | 207   | 656  | regulation of cell development                        |
| GO:0007268 | 4.06E-20 | 2.60      | 88.57    | 171   | 507  | chemical synaptic transmission                        |
| GO:0098916 | 4.06E-20 | 2.60      | 88.57    | 171   | 507  | anterograde trans-synaptic signaling                  |
| GO:0031175 | 5.46E-20 | 2.31      | 122.11   | 216   | 699  | neuron projection development                         |
| GO:0051960 | 3.12E-19 | 2.35      | 110.05   | 198   | 630  | regulation of nervous system development              |
| GO:0050767 | 3.76E-19 | 2.44      | 99.05    | 183   | 567  | regulation of neurogenesis                            |
| GO:0042063 | 1.47E-18 | 3.60      | 39.48    | 95    | 226  | gliogenesis                                           |
| GO:0045333 | 2.82E-18 | 5.53      | 20.09    | 61    | 115  | cellular respiration                                  |
| GO:0006520 | 6.11E-18 | 3.49      | 40.18    | 95    | 230  | cellular amino acid metabolic process                 |
| GO:0050905 | 6.93E-18 | 8.41      | 12.40    | 45    | 71   | neuromuscular process                                 |
| GO:1901566 | 8.66E-18 | 2.02      | 167.35   | 267   | 958  | organonitrogen compound biosynthetic process          |
| GO:0048589 | 1.36E-17 | 2.54      | 79.31    | 152   | 454  | developmental growth                                  |
| GO:0050877 | 1.46E-17 | 2.23      | 115.82   | 201   | 663  | nervous system process                                |
| GO:1901698 | 3.02E-17 | 2.08      | 141.50   | 233   | 810  | response to nitrogen compound                         |
| GO:0010243 | 3.08E-17 | 2.13      | 132.06   | 221   | 756  | response to organonitrogen compound                   |
| GO:0015980 | 3.60E-17 | 3.87      | 31.79    | 80    | 182  | energy derivation by oxidation of organic compounds   |
| GO:0007626 | 4.76E-17 | 4.62      | 23.76    | 66    | 136  | locomotory behavior                                   |
| GO:0030900 | 7.38E-17 | 3.12      | 46.64    | 103   | 267  | forebrain development                                 |
| GO:1901214 | 2.42E-16 | 3.22      | 42.10    | 95    | 241  | regulation of neuron death                            |
| GO:0006811 | 2.99E-16 | 1.94      | 171.54   | 267   | 982  | ion transport                                         |
| GO:0010001 | 3.93E-16 | 3.94      | 28.65    | 73    | 164  | glial cell differentiation                            |
| GO:0009790 | 5.09E-16 | 2.13      | 119.31   | 201   | 683  | embryo development                                    |
| GO:0070997 | 7.50E-16 | 2.99      | 47.34    | 102   | 271  | neuron death                                          |
| GO:0032990 | 1.07E-15 | 2.35      | 85.77    | 156   | 491  | cell part morphogenesis                               |
| GO:0048812 | 2.16E-15 | 2.36      | 81.93    | 150   | 469  | neuron projection morphogenesis                       |
| GO:0055085 | 2.53E-15 | 1.95      | 156.17   | 245   | 894  | transmembrane transport                               |
| GO:0022904 | 2.65E-15 | 7.36      | 11.88    | 41    | 68   | respiratory electron transport chain                  |
| GO:0120039 | 2.95E-15 | 2.34      | 83.68    | 152   | 479  | plasma membrane bounded cell projection morphogenesis |
| GO:0032989 | 3.56E-15 | 2.22      | 96.60    | 169   | 553  | cellular component morphogenesis                      |
| GO:0048667 | 4.04E-15 | 2.42      | 75.12    | 140   | 430  | cell morphogenesis involved in neuron differentiation |
| GO:0048858 | 5.38E-15 | 2.32      | 84.20    | 152   | 482  | cell projection morphogenesis                         |
| GO:0034762 | 1.06E-14 | 2.58      | 61.49    | 120   | 352  | regulation of transmembrane transport                 |
| GO:0009628 | 1.11E-14 | 1.93      | 151.45   | 237   | 867  | response to abiotic stimulus                          |
| GO:0061564 | 1.17E-14 | 2.50      | 66.56    | 127   | 381  | axon development                                      |
| GO:0006812 | 2.08E-14 | 2.04      | 120.88   | 198   | 692  | cation transport                                      |
| GO:0000904 | 2.61E-14 | 2.20      | 92.41    | 161   | 529  | cell morphogenesis involved in differentiation        |

**Table S9. Biological process GO terms enriched in the HSP network.** Top 50 biological process (BP) GO terms enriched in the HSP network integrating proteins by using a hypergeometric distribution function statistical analysis. GOBPID, Gene Ontology term identification number; P value, probability value for each GO term tested; OddsRatio, the strength of the association; ExpCount, the expected number of selected genes annotated at the GO term; Count, the number of genes present in the HSP network that are annotated at the GO term; Size, the number of total proteins that are annotated at the GO term; Term, the GO term name.

**Table S10**

| GOCCID     | Pvalue   | OddsRatio | ExpCount | Count | Size | Term                                                          |
|------------|----------|-----------|----------|-------|------|---------------------------------------------------------------|
| GO:0005739 | 9.45E-29 | 2.56      | 143.36   | 267   | 831  | mitochondrion                                                 |
| GO:0043005 | 9.09E-23 | 2.25      | 156.82   | 269   | 909  | neuron projection                                             |
| GO:0005759 | 2.30E-22 | 3.97      | 40.89    | 104   | 237  | mitochondrial matrix                                          |
| GO:0030424 | 3.87E-22 | 2.86      | 77.46    | 160   | 449  | axon                                                          |
| GO:0045202 | 6.47E-20 | 2.12      | 161.82   | 267   | 938  | synapse                                                       |
| GO:0036477 | 3.52E-16 | 2.22      | 104.20   | 182   | 604  | somatodendritic compartment                                   |
| GO:0098796 | 1.40E-14 | 2.02      | 125.08   | 204   | 725  | membrane protein complex                                      |
| GO:0098803 | 3.53E-14 | 11.28     | 7.42     | 30    | 43   | respiratory chain complex                                     |
| GO:0098794 | 9.32E-14 | 2.27      | 79.19    | 142   | 459  | postsynapse                                                   |
| GO:0044297 | 5.86E-13 | 2.26      | 74.87    | 134   | 434  | cell body                                                     |
| GO:0097060 | 8.93E-13 | 2.72      | 45.03    | 92    | 261  | synaptic membrane                                             |
| GO:0070469 | 3.62E-12 | 7.58      | 8.80     | 31    | 51   | respirasome                                                   |
| GO:0005746 | 1.06E-11 | 7.87      | 8.11     | 29    | 47   | mitochondrial respirasome                                     |
| GO:0005743 | 1.57E-11 | 2.86      | 35.37    | 75    | 205  | mitochondrial inner membrane                                  |
| GO:1990204 | 1.91E-11 | 5.71      | 11.21    | 35    | 65   | oxidoreductase complex                                        |
| GO:0043025 | 4.15E-11 | 2.21      | 66.07    | 117   | 383  | neuronal cell body                                            |
| GO:0005740 | 4.39E-11 | 2.24      | 63.14    | 113   | 366  | mitochondrial envelope                                        |
| GO:0045211 | 6.08E-11 | 2.96      | 30.88    | 67    | 179  | postsynaptic membrane                                         |
| GO:0019866 | 6.08E-11 | 2.60      | 41.75    | 83    | 242  | organelle inner membrane                                      |
| GO:0031966 | 8.59E-11 | 2.25      | 60.04    | 108   | 348  | mitochondrial membrane                                        |
| GO:0032838 | 6.99E-10 | 3.72      | 17.60    | 44    | 102  | plasma membrane bounded cell projection cytoplasm             |
| GO:0005747 | 7.84E-10 | 14.56     | 4.14     | 18    | 24   | mitochondrial respiratory chain complex I                     |
| GO:0030964 | 7.84E-10 | 14.56     | 4.14     | 18    | 24   | NADH dehydrogenase complex                                    |
| GO:0045271 | 7.84E-10 | 14.56     | 4.14     | 18    | 24   | respiratory chain complex I                                   |
| GO:1990351 | 9.21E-10 | 2.71      | 32.61    | 67    | 189  | transporter complex                                           |
| GO:0030425 | 1.74E-09 | 2.00      | 73.66    | 122   | 427  | dendrite                                                      |
| GO:0120111 | 1.82E-09 | 5.04      | 10.52    | 31    | 61   | neuron projection cytoplasm                                   |
| GO:0097447 | 2.38E-09 | 1.99      | 74.01    | 122   | 429  | dendritic tree                                                |
| GO:0031967 | 6.10E-09 | 1.77      | 109.72   | 165   | 636  | organelle envelope                                            |
| GO:0031975 | 6.10E-09 | 1.77      | 109.72   | 165   | 636  | envelope                                                      |
| GO:0044304 | 6.41E-09 | 5.48      | 8.80     | 27    | 51   | main axon                                                     |
| GO:1902495 | 8.55E-09 | 2.59      | 32.09    | 64    | 186  | transmembrane transporter complex                             |
| GO:0098590 | 1.36E-08 | 1.66      | 139.39   | 199   | 808  | plasma membrane region                                        |
| GO:0099568 | 1.41E-08 | 2.96      | 22.94    | 50    | 133  | cytoplasmic region                                            |
| GO:0005773 | 3.60E-08 | 1.82      | 85.22    | 132   | 494  | vacuole                                                       |
| GO:0098800 | 4.90E-08 | 4.09      | 11.73    | 31    | 68   | inner mitochondrial membrane protein complex                  |
| GO:0034702 | 6.04E-08 | 2.55      | 29.33    | 58    | 170  | ion channel complex                                           |
| GO:1904115 | 6.31E-08 | 6.37      | 6.38     | 21    | 37   | axon cytoplasm                                                |
| GO:0098798 | 7.68E-08 | 2.99      | 20.01    | 44    | 116  | mitochondrial protein complex                                 |
| GO:0098793 | 8.47E-08 | 1.92      | 65.56    | 106   | 380  | presynapse                                                    |
| GO:0000323 | 1.04E-07 | 1.84      | 76.94    | 120   | 446  | lytic vacuole                                                 |
| GO:0005764 | 1.04E-07 | 1.84      | 76.94    | 120   | 446  | lysosome                                                      |
| GO:0005777 | 1.36E-07 | 3.53      | 13.97    | 34    | 81   | peroxisome                                                    |
| GO:0042579 | 1.36E-07 | 3.53      | 13.97    | 34    | 81   | microbody                                                     |
| GO:1902494 | 1.51E-07 | 1.60      | 139.22   | 194   | 807  | catalytic complex                                             |
| GO:0005778 | 2.11E-07 | 6.07      | 6.21     | 20    | 36   | peroxisomal membrane                                          |
| GO:0031903 | 2.11E-07 | 6.07      | 6.21     | 20    | 36   | microbody membrane                                            |
| GO:0042175 | 2.47E-07 | 1.69      | 101.10   | 148   | 586  | nuclear outer membrane-endoplasmic reticulum membrane network |
| GO:0043202 | 2.92E-07 | 3.55      | 13.11    | 32    | 76   | lysosomal lumen                                               |
| GO:1990391 | 6.21E-07 | 6.86      | 5.00     | 17    | 29   | DNA repair complex                                            |

**Table S10. Cellular compartment GO terms enriched in the HSP network.** Top 50 cellular compartment (CC) GO terms enriched in the HSP network integrating proteins by using a hypergeometric distribution function statistical analysis. GOCCID, Gene Ontology term identification number; P value, probability value for each GO term tested; OddsRatio, the strength of the association; ExpCount, the expected number of selected genes annotated at the GO term; Count, the number of genes present in the HSP network that are annotated at the GO term, Size, the number of total proteins that are annotated at the GO term; Term, the GO term name.

**Table S11**

| Symbol  | Full name                                                                   | geneID | Classif.  | lof_z  | mis_z     | pLI      | pRec     | pNull    |
|---------|-----------------------------------------------------------------------------|--------|-----------|--------|-----------|----------|----------|----------|
| ACHE    | acetylcholinesterase (Cartwright blood group)                               | 43     | candidate | 4.25   | 2.75      | 9.98E-01 | 1.73E-03 | 7.25E-09 |
| ADM     | adrenomedullin                                                              | 133    | candidate | 1.31   | -0.107    | 4.08E-02 | 8.53E-01 | 1.06E-01 |
| AGER    | advanced glycosylation end-product specific receptor                        | 177    | candidate | 0.198  | 8.83E-02  | 6.35E-16 | 1.48E-02 | 9.85E-01 |
| ARC     | activity regulated cytoskeleton associated protein                          | 23237  | candidate | 2.98   | 2.6       | 5.94E-01 | 4.05E-01 | 3.70E-04 |
| BECN1   | beclin 1                                                                    | 8678   | candidate | 4.04   | 1.88      | 9.37E-01 | 6.28E-02 | 4.15E-07 |
| CASP3   | caspase 3                                                                   | 836    | candidate | 2.37   | 1.66      | 1.00E-01 | 8.93E-01 | 6.61E-03 |
| CCR2    | C-C motif chemokine receptor 2                                              | 729230 | candidate | 1.63   | 3.39E-02  | 2.34E-02 | 9.19E-01 | 5.72E-02 |
| CNR1    | cannabinoid receptor 1                                                      | 1268   | candidate | 2.42   | 2.62      | 5.07E-01 | 4.90E-01 | 3.65E-03 |
| CRK     | CRK proto-oncogene, adaptor protein                                         | 1398   | candidate | 3.27   | 2.37      | 9.59E-01 | 4.06E-02 | 1.67E-05 |
| CSF2    | colony stimulating factor 2                                                 | 1437   | candidate | 2.26   | 0.377     | 8.35E-01 | 1.62E-01 | 2.95E-03 |
| CXCL10  | C-X-C motif chemokine ligand 10                                             | 3627   | candidate | 1.59   | 0.335     | 3.69E-01 | 5.87E-01 | 4.42E-02 |
| CYP2B6  | cytochrome P450 family 2 subfamily B member 6                               | 1555   | candidate | 0.737  | -0.976    | 1.93E-10 | 2.32E-01 | 7.68E-01 |
| DECR1   | 2,4-dienoyl-CoA reductase 1                                                 | 1666   | candidate | -0.582 | 3.16E-02  | 4.47E-14 | 6.88E-03 | 9.93E-01 |
| DLG4    | discs large MAGUK scaffold protein 4                                        | 1742   | candidate | 5.46   | 4.93      | 1.00E+00 | 4.60E-04 | 4.81E-13 |
| DNAH7   | dynein axonemal heavy chain 7                                               | 56171  | candidate | 3.5    | -1.09     | 1.35E-71 | 2.50E-02 | 9.75E-01 |
| EIF2S1  | eukaryotic translation initiation factor 2 subunit alpha                    | 1965   | candidate | 3.39   | 2.86      | 9.70E-01 | 2.97E-02 | 7.67E-06 |
| EIF3K   | eukaryotic translation initiation factor 3 subunit K                        | 27335  | candidate | 2.08   | 0.761     | 2.10E-03 | 9.80E-01 | 1.76E-02 |
| ENO2    | enolase 2                                                                   | 2026   | candidate | 3.4    | 1.81      | 3.84E-01 | 6.16E-01 | 7.86E-05 |
| FOSB    | FosB proto-oncogene, AP-1 transcription factor subunit                      | 2354   | candidate | 3.45   | 1.55      | 9.76E-01 | 2.45E-02 | 4.75E-06 |
| GABPA   | GA binding protein transcription factor subunit alpha                       | 2551   | candidate | 4.47   | 3.12      | 9.98E-01 | 1.88E-03 | 1.81E-09 |
| GAP43   | growth associated protein 43                                                | 2596   | candidate | 1.58   | -6.79E-02 | 2.15E-02 | 9.15E-01 | 6.40E-02 |
| GRAP2   | GRB2 related adaptor protein 2                                              | 9402   | candidate | 2.39   | 1.12      | 1.53E-04 | 9.93E-01 | 6.52E-03 |
| GRM5    | glutamate metabotropic receptor 5                                           | 2915   | candidate | 5.24   | 3.21      | 9.99E-01 | 1.28E-03 | 5.85E-12 |
| GTF2H1  | general transcription factor IIH subunit 1                                  | 2965   | candidate | 4.53   | 1.8       | 9.90E-01 | 1.02E-02 | 4.56E-09 |
| HDAC3   | histone deacetylase 3                                                       | 8841   | candidate | 3.93   | 3.72      | 5.67E-01 | 4.33E-01 | 3.84E-06 |
| HDAC9   | histone deacetylase 9                                                       | 9734   | candidate | 6.32   | 2.06      | 1.00E+00 | 2.68E-04 | 2.16E-16 |
| HMGB1   | high mobility group box 1                                                   | 3146   | candidate | 2.64   | 2.69      | 8.20E-01 | 1.79E-01 | 7.76E-04 |
| HSD17B6 | hydroxysteroid 17-beta dehydrogenase 6                                      | 8630   | candidate | 2.59   | 0.492     | 3.48E-01 | 6.49E-01 | 2.51E-03 |
| HSPA4   | heat shock protein family A (Hsp70) member 4                                | 3308   | candidate | 5.66   | 2.06      | 1.00E+00 | 4.63E-04 | 9.89E-14 |
| HSPA5   | heat shock protein family A (Hsp70) member 5                                | 3309   | candidate | 3.61   | 4.03      | 7.73E-01 | 2.27E-01 | 1.24E-05 |
| ICAM1   | intercellular adhesion molecule 1                                           | 3383   | candidate | 2.79   | 1.90E-02  | 3.53E-02 | 9.63E-01 | 1.46E-03 |
| IFNB1   | interferon beta 1                                                           | 3456   | candidate | NA     | -0.759    | NA       | NA       | NA       |
| IL18    | interleukin 18                                                              | 3606   | candidate | 1.13   | 1.52      | 3.07E-02 | 8.23E-01 | 1.46E-01 |
| IL1A    | interleukin 1 alpha                                                         | 3552   | candidate | 0.886  | 0.541     | 1.60E-04 | 6.94E-01 | 3.06E-01 |
| IL2     | interleukin 2                                                               | 3558   | candidate | 1.86   | 1.43      | 4.80E-01 | 5.00E-01 | 2.05E-02 |
| IMMT    | inner membrane mitochondrial protein                                        | 10989  | candidate | 4.11   | 0.763     | 1.33E-02 | 9.87E-01 | 2.13E-06 |
| ISYNA1  | inositol-3-phosphate synthase 1                                             | 51477  | candidate | 2.14   | 1.27      | 2.49E-05 | 9.83E-01 | 1.73E-02 |
| KCNA3   | potassium voltage-gated channel subfamily A member 3                        | 3738   | candidate | 3.25   | 3.02      | 8.94E-01 | 1.06E-01 | 3.88E-05 |
| KHDRBS1 | KH RNA binding domain containing, signal transduction associated 1          | 10657  | candidate | 3.91   | 2.42      | 9.94E-01 | 5.77E-03 | 1.37E-07 |
| LTA     | lymphotoxin alpha                                                           | 4049   | candidate | 1.69   | 1.81      | 1.97E-01 | 7.62E-01 | 4.15E-02 |
| LY6E    | lymphocyte antigen 6 family member E                                        | 4061   | candidate | 1.45   | 0.574     | 3.21E-01 | 6.18E-01 | 6.11E-02 |
| MAPK14  | mitogen-activated protein kinase 14                                         | 1432   | candidate | 3.39   | 3.31      | 3.75E-01 | 6.25E-01 | 8.44E-05 |
| MAPK3   | mitogen-activated protein kinase 3                                          | 5595   | candidate | 2.8    | 1.74      | 3.69E-02 | 9.62E-01 | 1.36E-03 |
| MIR146A | microRNA 146a                                                               | 406938 | candidate | NA     | NA        | NA       | NA       | NA       |
| MTG1    | mitochondrial ribosome associated GTPase 1                                  | 92170  | candidate | 2.4    | -0.524    | 1.33E-02 | 9.81E-01 | 6.17E-03 |
| NDUFA5  | NADH:ubiquinone oxidoreductase subunit A5                                   | 4698   | candidate | 0.876  | 0.2       | 1.87E-03 | 7.41E-01 | 2.57E-01 |
| NDUFA7  | NADH:ubiquinone oxidoreductase subunit A7                                   | 4701   | candidate | -0.201 | -0.241    | 6.60E-05 | 3.00E-01 | 7.00E-01 |
| NDUFB1  | NADH:ubiquinone oxidoreductase subunit B1                                   | 4707   | candidate | -0.554 | -0.207    | 3.59E-05 | 2.19E-01 | 7.81E-01 |
| NDUFB3  | NADH:ubiquinone oxidoreductase subunit B3                                   | 4731   | candidate | -1.5   | -0.31     | 2.80E-18 | 3.17E-04 | 1.00E+00 |
| NPY     | neuropeptide Y                                                              | 4852   | candidate | 1.47   | 0.643     | 1.43E-01 | 7.86E-01 | 7.10E-02 |
| NRG1    | neuregulin 1                                                                | 3084   | candidate | 4.57   | 0.637     | 9.97E-01 | 3.35E-03 | 1.49E-09 |
| OPRM1   | opioid receptor mu 1                                                        | 4988   | candidate | 0.526  | -0.619    | 7.89E-11 | 1.43E-01 | 8.57E-01 |
| PARP1   | poly(ADP-ribose) polymerase 1                                               | 142    | candidate | 4.52   | 0.818     | 3.34E-04 | 1.00E+00 | 1.48E-07 |
| PCYT2   | phosphate cytidylyltransferase 2, ethanolamine                              | 5833   | candidate | 2.62   | 1.73      | 8.64E-04 | 9.96E-01 | 2.69E-03 |
| PDC     | phosducin                                                                   | 5132   | candidate | 0.676  | 0.603     | 1.01E-04 | 5.94E-01 | 4.06E-01 |
| PI4KA   | phosphatidylinositol 4-kinase alpha                                         | 5297   | candidate | 6.53   | 3.53      | 3.12E-12 | 1.00E+00 | 9.17E-15 |
| PLA2G1B | phospholipase A2 group IB                                                   | 5319   | candidate | -2.08  | -0.709    | 1.01E-10 | 6.60E-03 | 9.93E-01 |
| PLB1    | phospholipase B1                                                            | 151056 | candidate | -0.413 | -0.588    | 1.73E-72 | 2.99E-12 | 1.00E+00 |
| POLDIP2 | DNA polymerase delta interacting protein 2                                  | 26073  | candidate | 3.44   | 1.94      | 4.14E-01 | 5.86E-01 | 6.24E-05 |
| POTEF   | POTE ankyrin domain family member F                                         | 728378 | candidate | 1.53   | -2.74     | 5.45E-06 | 8.82E-01 | 1.18E-01 |
| PPARA   | peroxisome proliferator activated receptor alpha                            | 5465   | candidate | 2.73   | 1.81      | 3.02E-02 | 9.68E-01 | 1.84E-03 |
| PPIG    | peptidylprolyl isomerase G                                                  | 9360   | candidate | 4.93   | 1.72      | 9.63E-01 | 3.71E-02 | 9.15E-10 |
| RAP1B   | RAP1B, member of RAS oncogene family                                        | 5908   | candidate | 2.96   | 2.6       | 9.10E-01 | 8.99E-02 | 1.25E-04 |
| RNF19A  | ring finger protein 19A, RBR E3 ubiquitin protein ligase                    | 25897  | candidate | 4      | 2.38      | 2.53E-02 | 9.75E-01 | 4.05E-06 |
| RNR1    | RNA, ribosomal 45S cluster 1                                                | 6052   | candidate | NA     | NA        | NA       | NA       | NA       |
| ROS1    | ROS proto-oncogene 1, receptor tyrosine kinase                              | 6098   | candidate | 0.455  | -0.501    | 1.62E-72 | 1.47E-10 | 1.00E+00 |
| SELP    | selectin P                                                                  | 6403   | candidate | -0.215 | -0.256    | 5.04E-32 | 1.72E-05 | 1.00E+00 |
| SHMT2   | serine hydroxymethyltransferase 2                                           | 6472   | candidate | 2.16   | 1.52      | 7.82E-08 | 9.77E-01 | 2.28E-02 |
| SOD2    | superoxide dismutase 2                                                      | 6648   | candidate | 2.11   | 0.887     | 1.55E-01 | 8.30E-01 | 1.46E-02 |
| SVBP    | small vasohibin binding protein                                             | 374969 | candidate | -0.258 | 0.374     | 1.13E-03 | 4.04E-01 | 5.95E-01 |
| TGM2    | transglutaminase 2                                                          | 7052   | candidate | 0.703  | 0.536     | 6.81E-18 | 2.71E-02 | 9.73E-01 |
| TXNRD1  | thioredoxin reductase 1                                                     | 7296   | candidate | 2.79   | 1.32      | 1.61E-06 | 9.98E-01 | 1.55E-03 |
| UBAP1   | ubiquitin associated protein 1                                              | 51271  | candidate | 3.32   | 0.869     | 9.12E-01 | 8.83E-02 | 2.42E-05 |
| UTRN    | utrophin                                                                    | 7402   | candidate | 8.61   | 0.371     | 1.00E-19 | 1.00E+00 | 8.03E-25 |
| YWHAZ   | tyrosine 3-monooxygenase/tryptophan 5-monooxygenase activation protein zeta | 7534   | candidate | 3.13   | 3.1       | 9.40E-01 | 6.03E-02 | 4.52E-05 |

**Table S11.** Candidate genes in the HSP expanded network. Seventy-five candidate genes predicted by the prioritization tool to be associated with HSP disease. Gene constraints: lof\_z, the Z-score value of being LoF intolerant; mis\_z, the Z-score value of being intolerant to missense variation; pLI, the probability of being LoF intolerant; pRec, the probability of being intolerant to homozygous variation.
